# Supplementary material for: Cold atmospheric plasma for preventing infection of viruses that use ACE2 for entry
Source: PubMed Central journal article supplement (PMC8965494; doi:10.7150/thno.70098), 2022-03-14

# Cold atmospheric plasma for preventing infection of viruses that use ACE2 for entry

**Peiyu Wang<sup>a,b,c,d,1</sup>, Renwu Zhou<sup>e,f,1</sup>, Rusen Zhou<sup>e,f,1</sup>, Wenshao Li<sup>g</sup>, Janith Weerasinghe<sup>e</sup>, Shuxiong Chen<sup>h</sup>, Bernd H. A. Rehm<sup>h</sup>, Liqian Zhao<sup>i</sup>, Francesca D. Frentiu<sup>c,j</sup>, Zhifa Zhang<sup>a</sup>, Kexin Yan<sup>k</sup>, Mary Lor<sup>k</sup>, Andreas Suhrbier<sup>k,l</sup>, Derek Richard<sup>c,d</sup>, Erik W. Thompson<sup>c,d</sup>, Kostya (Ken) Ostrikov<sup>e</sup>, and Xiaofeng Dai<sup>a,1,2</sup>**

<sup>a</sup>Wuxi School of Medicine, Jiangnan University, Wuxi 214122, China

<sup>b</sup>State Key Laboratory of Molecular Vaccinology and Molecular Diagnostics & Center for Molecular Imaging and Translational Medicine, School of Public Health, Xiamen University, Xiamen 361102, China.

<sup>c</sup>School of Biomedical Sciences, Queensland University of Technology, Brisbane 4059, Australia

<sup>d</sup>Translational Research Institute, Woolloongabba, Queensland 4102, Australia

<sup>e</sup>School of Chemistry and Physics, Queensland University of Technology, Brisbane 4000, Australia

<sup>f</sup>School of Chemical and Biomolecular Engineering, University of Sydney, Sydney, Australia

<sup>g</sup>School of Biology and Environmental Science, Queensland University of Technology, Brisbane 4000, Queensland, Australia

<sup>h</sup>Centre for Cell Factories and Biopolymers, Griffith Institute for Drug Discovery, Griffith University, Nathan, QLD 4111, Australia

<sup>i</sup>The First School of Clinical Medicine, Southern Medical University, Guangzhou 510515, China

<sup>j</sup>Centre for Immunology and Infection Control, Queensland University of Technology, Brisbane 4059, Australia

<sup>k</sup>QIMR Berghofer Medical Research Institute, Herston QLD 4006, Australia

<sup>l</sup>Australian Infectious Disease Research Centre, GVN Center of Excellence, Brisbane, Queensland, Australia.

<sup>1</sup>These authors contributed equally to this work.

<sup>2</sup>To whom correspondence may be addressed. Email: xiaofeng.dai@jiangnan.edu.cn

**Table S1. Q-TOF/MS analysis of PhaC-SARS-CoV-2 antigen fusion proteins.**

| Protein/Protein sequence*                                                                                                                                                                                                                                                                                                                                                                                                                                                                                                                                                                                                                                                                                                                                                                                                                                                                                                                                                                                                                                                                                                                                                                                                                                                                                                                                                                                                                                                                                                                                                                                                                                                                                                       | Peptide fragments assigned to the various protein regions                                                                                                                                                                                                                                                       |
|---------------------------------------------------------------------------------------------------------------------------------------------------------------------------------------------------------------------------------------------------------------------------------------------------------------------------------------------------------------------------------------------------------------------------------------------------------------------------------------------------------------------------------------------------------------------------------------------------------------------------------------------------------------------------------------------------------------------------------------------------------------------------------------------------------------------------------------------------------------------------------------------------------------------------------------------------------------------------------------------------------------------------------------------------------------------------------------------------------------------------------------------------------------------------------------------------------------------------------------------------------------------------------------------------------------------------------------------------------------------------------------------------------------------------------------------------------------------------------------------------------------------------------------------------------------------------------------------------------------------------------------------------------------------------------------------------------------------------------|-----------------------------------------------------------------------------------------------------------------------------------------------------------------------------------------------------------------------------------------------------------------------------------------------------------------|
| PhaC-RBD (89.9 kDa)                                                                                                                                                                                                                                                                                                                                                                                                                                                                                                                                                                                                                                                                                                                                                                                                                                                                                                                                                                                                                                                                                                                                                                                                                                                                                                                                                                                                                                                                                                                                                                                                                                                                                                             |                                                                                                                                                                                                                                                                                                                 |
| MATGK <b>GAAASTQEGKSQPFKVT</b> PGPFDPATWLEWSRQWOGTEGNGHAA<br>AASGIPGLDALAGVKIAPAQLGDIQQRVMKDFSAWQAMAEGKAEATG<br>PLHRRFAGDAWRNLPYRFAAAFYLLNARALTELADAVEADAKTR <b>QR</b><br>IRFAISQWVDAMSPANFLATNPEAQRLLIESGGESLRAGVRNMMEDLTR<br>GKISQTDSEAFEVGRNVAVTEGAVVFENEYFQLQYKPLTDKVHARPLL<br>MVPPCINKYYILDLOPESSLVRHVVEQGHTVFLVSWRNPDASMAGSTWD<br>DYIEHAAIR <b>AIEVAR</b> DISGQDKINVLGFCVGGTIVSTALAVLAARGEHPAA<br>SVTLLTLLDFADTGILDFVDEGHVQLREATLGGGAGAPCALLRGLLEL<br>ANTFSFLRPNDLVWNYVVDNYLK <b>GNT</b> TPVFDLLFWNGDATNLPGPWYC<br>WYLRHTYLQNELKVPVKLTVCVGPVVDLASIDVPTYIYGSREDHIVPWA<br>AYASTALLANKLR <b>FVLGASGHIAGVINPPAK</b> NKRSHWTNDALPESPOQW<br>LAGAIEHHGSWW <b>PDWTAWLAGQAGAKRAAPANYGNARYR</b> AIEPAPGR<br>YVKAKA-Linker-<br>RVQPTESIVR <b>FPNITNLC</b> PFGEVENATRFASVYAWNRKRISNCVADYSVL<br>LYNSASFSTFKCYGV <b>SPTKLNDLC</b> FTNVYADSFVIRGDEVRQIAPGQTGKI<br>ADYNYKLPDDFTGC <b>VIAWNSNNLDSK</b> VGGNYNYLYRFRKSNLKPFFER<br>DISTEIQAGST <b>PCNG</b> VEGFNCYFPLQSY <b>GFQPTNGVGYQPYR</b> VVLSFE<br>LLHAPATVCGPKK                                                                                                                                                                                                                                                                                                                                                                                                                                                                                                                                                                                                                                                                                                                       | PhaC: G6-R141, F146-R299, D306-F318, L329-K413, G434-W536,<br>P549-R573, A576-R583<br><br>RBD: I624-T677, F684-R746, K750-C772, G788-K821                                                                                                                                                                       |
| RBD-PhaC-N protein (135.4 kDa)                                                                                                                                                                                                                                                                                                                                                                                                                                                                                                                                                                                                                                                                                                                                                                                                                                                                                                                                                                                                                                                                                                                                                                                                                                                                                                                                                                                                                                                                                                                                                                                                                                                                                                  |                                                                                                                                                                                                                                                                                                                 |
| MRVQPTESIVR <b>FPNITNLC</b> PFGEVENATRFASVYAWNRKRISNCVADYSVL<br>LYNSASFSTFKCYGV <b>SPTKLNDLC</b> FTNVYADSFVIRGDEVRQIAPGQTGKI<br>ADYNYKLPDDFTGC <b>VIAWNSNNLDSK</b> VGGNYNYLYRFRKSNLKPFFER<br>DISTEIQAGST <b>PCNG</b> VEGFNCYFPLQSY <b>GFQPTNGVGYQPYR</b> VVLSFE<br>LLHAPATVCGPKK-Linker-<br>ATGKGAAASTQEGKSQPFKVT <b>PGPFDPATWLEWSRQWOGTEGNGHAA</b><br>ASGIPGLDALAGVKIAPAQLGDIQQRVMKDFSAWQAMAEGKAEATG <b>F</b><br>LHRRFAGDAWRNLPYRFAAAFYLLNARALTELADAVEADAK <b>TRQRI</b><br>RFAISQWVDAMSPANFLATNPEAQRLLIESGGESLRAGVRNMMEDLTRG<br>KISQTDSEAFEVGR <b>NVAVTEGAVVFENEYFQLQYKPLTDKVHARPLL</b><br>VPPCINKYYILDLOPESSLVRHVVEQGHTV <b>FLVSWRNPDASMAGSTWDD</b><br>YIEHAAIR <b>AIEVAR</b> DISGQDKINVLGFCVGGTIVSTALAVLAARGEHPAA <b>S</b><br>VTLLTLLDFADTGILDFVDEGHVQLREATLGGGAGAPCALLRGLLEL <b>A</b><br>NTFSFLRPNDLVWNYVVDNYLK <b>GNT</b> TPVFDLLFWNGDATNLPGPWYC<br>WYLRHTYLQNELKVPVKLTVCVGPVVDLASIDVPTYIYGSREDHIVPWA<br>AYASTALLANKLR <b>FVLGASGHIAGVINPPAK</b> NKRSHWTNDALPESPOQW<br>LAGAIEHHGSWW <b>PDWTAWLAGQAGAKRAAPANYGNARYR</b> AIEPAPGR<br>YVKAKA-Linker-<br>SDNGPQNQRNAPR <b>TFGGPSDSTGSNQNGERSGARSKORRPOGLPNNTAS</b><br>WFTALTQHGKEDLK <b>FPRGQGV</b> PINTNSSPDDQIGY <b>YR</b> ATTRIRGGDGK<br>MKDLS <b>PRWYFY</b> YLTGTGPEAGL <b>PYGANKDGIIWVATEGALNTPK</b> DHIGTR<br>NPANNA <b>AI</b> VLQ <b>LQ</b> PGTTL <b>PKGFY</b> AE <b>GS</b> RGG <b>SQASSRSSRSRNSRN</b> STPG<br>SSRGT <b>SPARMAG</b> NGGDAALALLLLDRL <b>NQLESKMSGK</b> GQQQ <b>QGTIVTK</b><br>K <b>SAEA</b> E <b>SKKPRQ</b> KRTAT <b>KAYNY</b> TQAF <b>GRRGPEQTQGNF</b> GDQELIR <b>Q</b> GTD<br>YKHWPQ <b>IAQFAPSASAFFGMSRIGMEVTPSGTWLTYTGAIKLDDKDPNT</b><br>K <b>DQVILLNKHIDAYKTFPPTEPKDKK</b> KADE <b>TQALPORQK</b> QQ <b>VTLL</b><br>PAADLDDFSK <b>LQOQSMSSADSTQA</b> | RBD: M1-R11, I15-K39, I41-K69, A81-R137, K141-P162, G179-R192<br><br>PhaC: A218-K355, F362-R423, V451-V488, N495-R515, G552-F610,<br>Y653-K671, L681-K714, F717-K734, R778-R788, A791-R800<br><br>N protein: I839-R913, M925-R931, Y936-K967, N974-R1001,<br>M1034-R1117, I1144-K1194, K1198-R1209, K1212-A1243 |

**Table S2. Genes differentially expressed on SARS-CoV-2 infection in human bronchial epithelial (NHBE) cells using GSE147507.**

| Gene name | log2FoldChange | p value  | p_adjust | Direction |
|-----------|----------------|----------|----------|-----------|
| CCL20     | 3.14396175     | 3.26E-80 | 3.91E-76 | up        |
| SAA2      | 2.42248925     | 3.4E-79  | 2.04E-75 | up        |
| SAA1      | 2.22177266     | 8.61E-58 | 3.44E-54 | up        |
| S100A8    | 1.86933142     | 2.92E-53 | 6.99E-50 | up        |
| IL36G     | 2.73218605     | 2.37E-53 | 6.99E-50 | up        |
| TNFAIP3   | 1.61148647     | 2.41E-52 | 4.82E-49 | up        |
| SPRR2D    | 2.97919497     | 1.76E-51 | 3.01E-48 | up        |
| INHBA     | 1.81922735     | 5.18E-51 | 7.76E-48 | up        |
| C3        | 1.50866591     | 4.32E-46 | 5.76E-43 | up        |
| KRT6B     | 1.54827214     | 9.85E-46 | 1.18E-42 | up        |
| ICAM1     | 1.86166523     | 1.76E-45 | 1.76E-42 | up        |
| TNIP1     | 1.26402353     | 1.71E-45 | 1.76E-42 | up        |
| CFB       | 1.8548093      | 2.18E-44 | 2.01E-41 | up        |
| CXCL1     | 1.4172731      | 2.58E-42 | 2.21E-39 | up        |
| SOD2      | 1.51945874     | 3.03E-38 | 2.42E-35 | up        |
| MX1       | 2.50985094     | 1.38E-36 | 1.04E-33 | up        |
| S100A9    | 1.10738825     | 5.9E-36  | 4.16E-33 | up        |

|          |            |            |            |      |
|----------|------------|------------|------------|------|
| ZC3H12A  | 1.67390106 | 1.13E-34   | 7.51E-32   | up   |
| C15orf48 | 1.23597139 | 2.1E-31    | 1.32E-28   | up   |
| LIF      | 1.30739366 | 4.38E-31   | 2.63E-28   | up   |
| CXCL5    | 3.48535834 | 7.82E-31   | 4.47E-28   | up   |
| RHCG     | 1.34872189 | 8.28E-31   | 4.52E-28   | up   |
| HBEGF    | 1.29188055 | 1.31E-30   | 6.84E-28   | up   |
| SLC6A14  | 1.21811219 | 2.83E-29   | 1.42E-26   | up   |
| IRF9     | 1.25047085 | 9.16E-29   | 4.39E-26   | up   |
| IL1B     | 1.06251861 | 4.02E-28   | 1.85E-25   | up   |
| SPRR2A   | 1.68768801 | 3.1E-27    | 1.38E-24   | up   |
| TNFAIP2  | 1.54932822 | 1.73E-26   | 7.39E-24   | up   |
| IL6      | 2.92646346 | 2.12E-26   | 8.77E-24   | up   |
| MMP9     | 2.28503359 | 1.42E-25   | 5.66E-23   | up   |
| IL32     | 1.22070157 | 1.7E-24    | 6.6E-22    | up   |
| SERPINA3 | 1.46770413 | 9.92E-24   | 3.72E-21   | up   |
| PDZK1IP1 | 2.4278506  | 2.79E-23   | 1.02E-20   | up   |
| OAS3     | 1.31779675 | 2.92E-23   | 1.03E-20   | up   |
| PLAT     | 1.39509077 | 1.09E-22   | 3.75E-20   | up   |
| CSF3     | 4.85032851 | 1.15E-22   | 3.82E-20   | up   |
| BIRC3    | 1.66152604 | 1.74E-22   | 5.64E-20   | up   |
| OAS2     | 1.2662775  | 2.84E-22   | 8.98E-20   | up   |
| OAS1     | 1.6954135  | 2.56E-19   | 7.68E-17   | up   |
| CXCL2    | 1.39127199 | 5.35E-19   | 1.57E-16   | up   |
| IRAK2    | 1.59984891 | 1.5E-18    | 4.19E-16   | up   |
| PGLYRP4  | 2.03747854 | 6.51E-18   | 1.74E-15   | up   |
| CXCL3    | 2.23021571 | 2.93E-17   | 7.64E-15   | up   |
| MAFF     | 1.13326426 | 6.1E-17    | 1.56E-14   | up   |
| SPRR2E   | 3.59793307 | 1.92E-16   | 4.8E-14    | up   |
| IL1A     | 1.07203604 | 7.41E-16   | 1.74E-13   | up   |
| HEPHL1   | 1.30788314 | 1.43E-15   | 3.29E-13   | up   |
| XAF1     | 2.53063831 | 1.98E-15   | 4.48E-13   | up   |
| IVL      | 1.03806572 | 5.92E-15   | 1.29E-12   | up   |
| IFI27    | 2.89474326 | 1.2E-14    | 2.58E-12   | up   |
| CIQTNF1  | 1.87212235 | 1.52E-14   | 3.19E-12   | up   |
| CSF2     | 2.97894511 | 5.15E-13   | 1.05E-10   | up   |
| IFITM10  | -1.5710814 | 1.63E-12   | 3.27E-10   | down |
| BCL2A1   | 2.28834639 | 2.52E-12   | 4.95E-10   | up   |
| IFITM1   | 1.6147879  | 1.18E-11   | 2.14E-09   | up   |
| EDN1     | 1.0605424  | 3.5E-10    | 5.83E-08   | up   |
| PI3      | 1.80075642 | 1.75E-09   | 2.56E-07   | up   |
| PDGFB    | 1.01434311 | 1.8E-09    | 2.61E-07   | up   |
| MX2      | 2.21993955 | 2.83E-09   | 3.99E-07   | up   |
| SOCS3    | 1.0373848  | 2.35E-08   | 0.00000285 | up   |
| VNN1     | 1.883174   | 3.53E-08   | 0.00000412 | up   |
| KRT4     | 1.01298875 | 4.22E-08   | 0.00000482 | up   |
| TYMP     | 1.04040175 | 4.89E-08   | 0.00000553 | up   |
| VTCN1    | -1.0742581 | 6.03E-08   | 0.00000676 | down |
| MYLK     | -1.4288626 | 6.57E-08   | 0.00000714 | down |
| CXCL14   | -1.4485315 | 6.6E-08    | 0.00000714 | down |
| METTL7A  | -1.0357868 | 1.44E-07   | 0.0000149  | down |
| ADAM8    | 1.01426869 | 1.94E-07   | 0.0000192  | up   |
| ITGB3    | 1.19799377 | 9.47E-07   | 0.0000836  | up   |
| CYP27B1  | 1.20606261 | 0.00000133 | 0.000113   | up   |
| TNFSF14  | 1.99248464 | 0.0000014  | 0.00011664 | up   |
| RND1     | 1.51644941 | 0.00000195 | 0.00015935 | up   |
| IRF7     | 1.57303744 | 0.00000278 | 0.00021648 | up   |
| TNF      | 1.80716236 | 0.00000394 | 0.00029508 | up   |

|          |            |            |            |      |
|----------|------------|------------|------------|------|
| MYEOV    | 1.28223564 | 0.00000483 | 0.0003513  | up   |
| KRT24    | 1.79683578 | 0.00000869 | 0.00059256 | up   |
| MAP7D2   | -1.3954685 | 0.00000867 | 0.00059256 | down |
| NID1     | -1.2290109 | 0.00000976 | 0.00065773 | down |
| HELZ2    | 1.01051942 | 0.0000232  | 0.00142745 | up   |
| VNN3     | 2.74162665 | 0.000026   | 0.00157425 | up   |
| MRGPRX3  | 1.95888146 | 0.000027   | 0.00162927 | up   |
| IFI6     | 2.34449344 | 0.0000344  | 0.00202474 | up   |
| PPARGC1A | -1.0471203 | 0.0000363  | 0.00210458 | down |
| TRIML2   | 1.39749281 | 0.0000463  | 0.00257094 | up   |
| TLR2     | 1.05056807 | 0.0000486  | 0.00268432 | up   |
| BST2     | 1.29187352 | 0.0000521  | 0.0028396  | up   |
| MAP3K8   | 1.06163063 | 0.0000574  | 0.00308576 | up   |
| EPSTI1   | 1.04447947 | 0.0000608  | 0.00324312 | up   |
| ATG9B    | -1.1310397 | 0.0000614  | 0.0032589  | down |
| GBP5     | 1.83077415 | 0.00012273 | 0.00603509 | up   |
| CXCL6    | 1.73041085 | 0.00012274 | 0.00603509 | up   |
| NANOS1   | -1.5176398 | 0.00012404 | 0.00607391 | down |
| S100A12  | 1.2238146  | 0.00017339 | 0.00809391 | up   |
| LTB      | 1.6385608  | 0.00018339 | 0.00849455 | up   |
| STAT5A   | 1.11992847 | 0.00018495 | 0.00853402 | up   |
| STON1    | -1.5080852 | 0.00019045 | 0.00872086 | down |
| IFI44L   | 2.27820079 | 0.00028877 | 0.01246185 | up   |
| MMP13    | 1.09446902 | 0.00030101 | 0.01285144 | up   |
| ZNF488   | -1.1399958 | 0.00037534 | 0.01516131 | down |
| CYP4F3   | -1.0730949 | 0.00041372 | 0.01632709 | down |
| FAM167A  | 1.09674174 | 0.00082419 | 0.02843076 | up   |
| P2RY6    | 1.13520504 | 0.00100864 | 0.03279294 | up   |
| RBM20    | -1.5835055 | 0.00127333 | 0.03967835 | down |
| PSMB9    | 1.01490868 | 0.00151653 | 0.04497961 | up   |
| C6orf223 | 1.15507754 | 0.00156657 | 0.04601422 | up   |

---

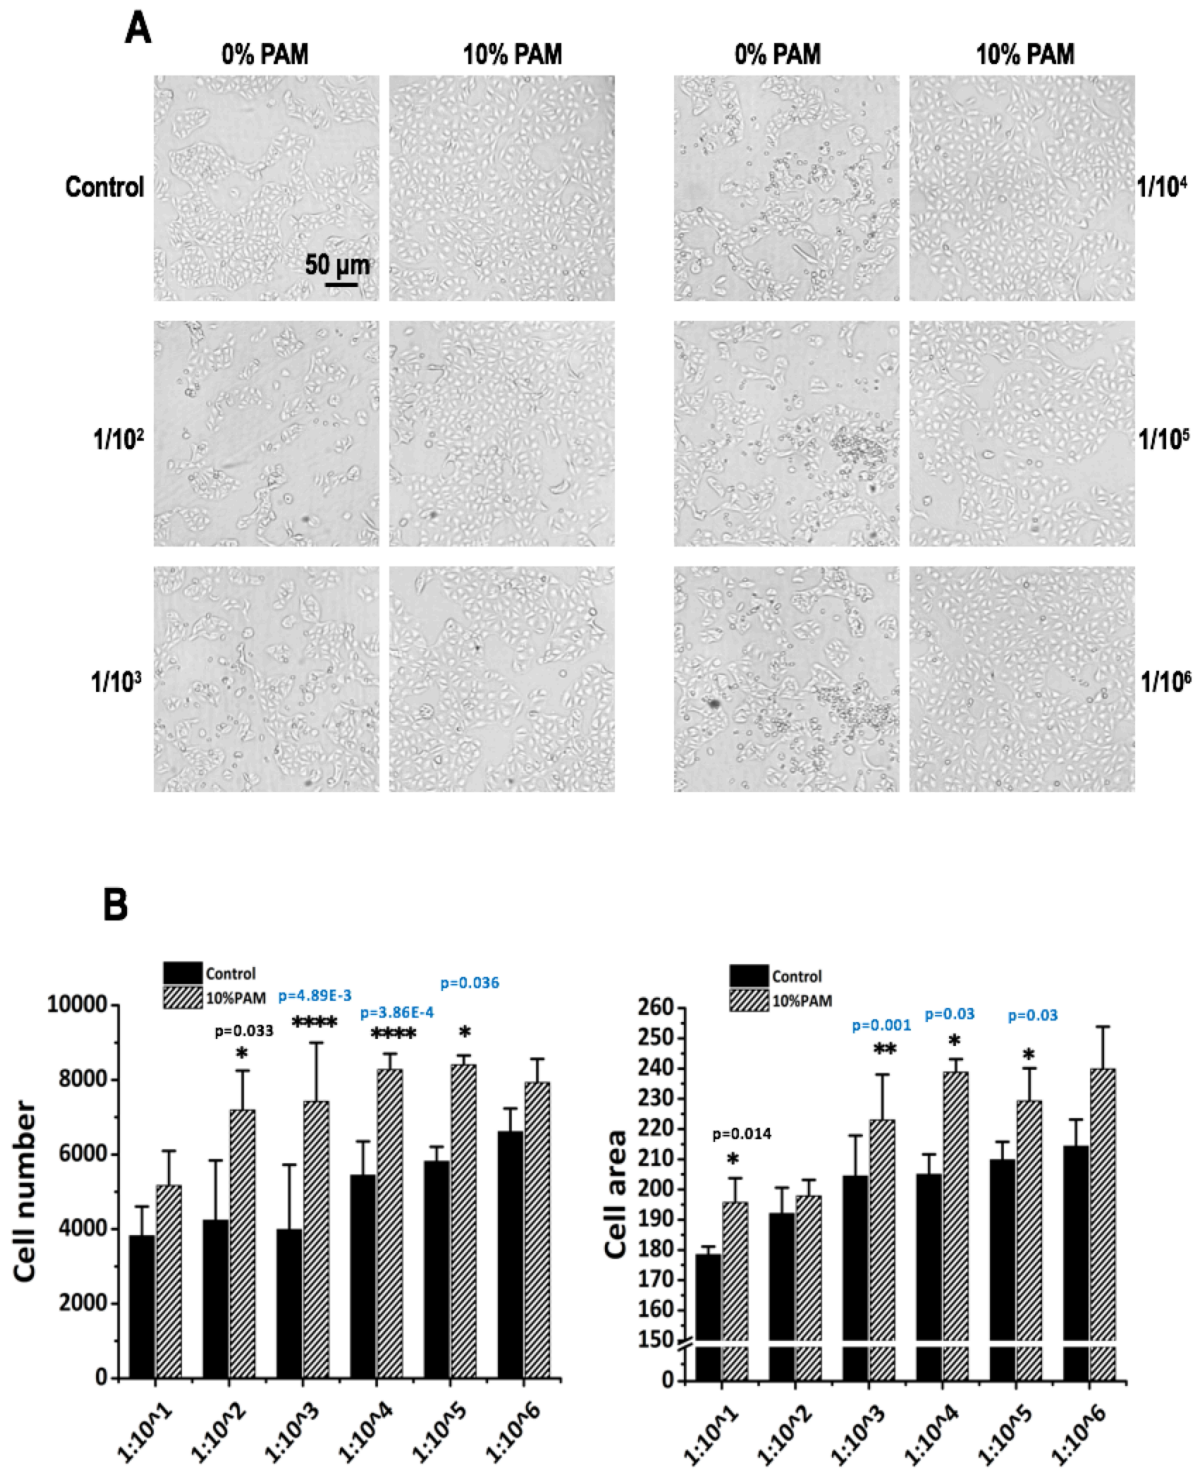

**Figure S1. Images showing the preventive role of CAP on Vero E6 cells against SARS-CoV-2 infection.** (A) Phase contrast images of cells infected with different dilution of 10E6.79 TCID<sub>50</sub>/mL virus, without (0% PAM) or with (10% PAM) pre-treatment, prior to virus addition. Cell morphology alterations were observed 1 day after exposing cells to 10 min 10% PAM treatment. (B) Graphs show quantification of cell number and cell area, conducted using IN Carta Analysis, with statistical analysis (n=4) using t-test assuming unequal variance or non-parametric tests, as appropriate. P values are shown above the bars in red if significant. Images of cells infected with SARS-CoV-2 at different dilution folds, without (Control) and with 10% PAM treatment prior to virus addition (10% PAM). Cell morphology alterations were observed 1 day after exposing cells to 10 min 10% PAM treatment. Quantification of cell number and cell area were conducted using IN Carta Analysis.

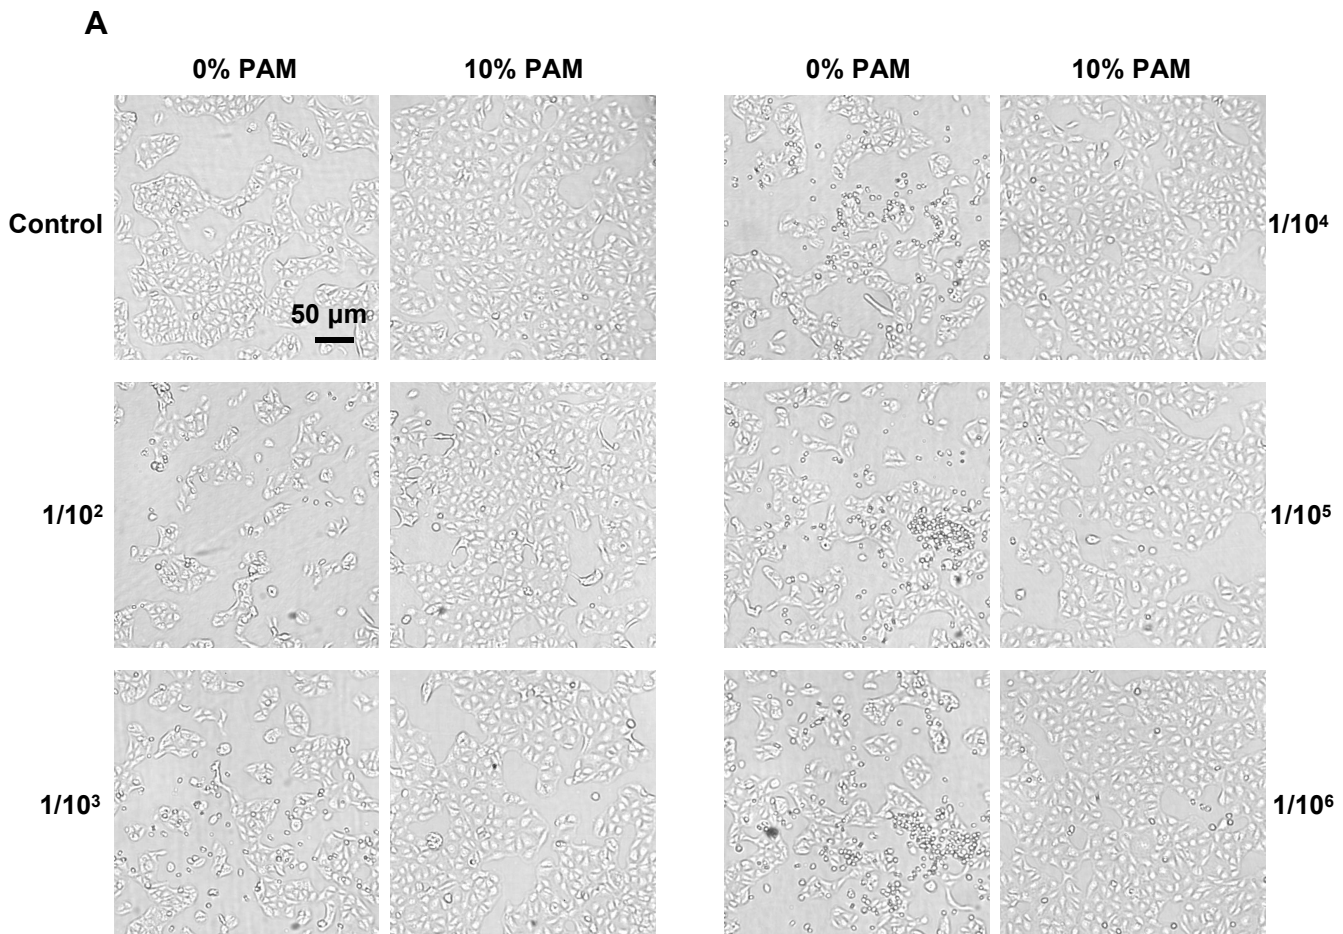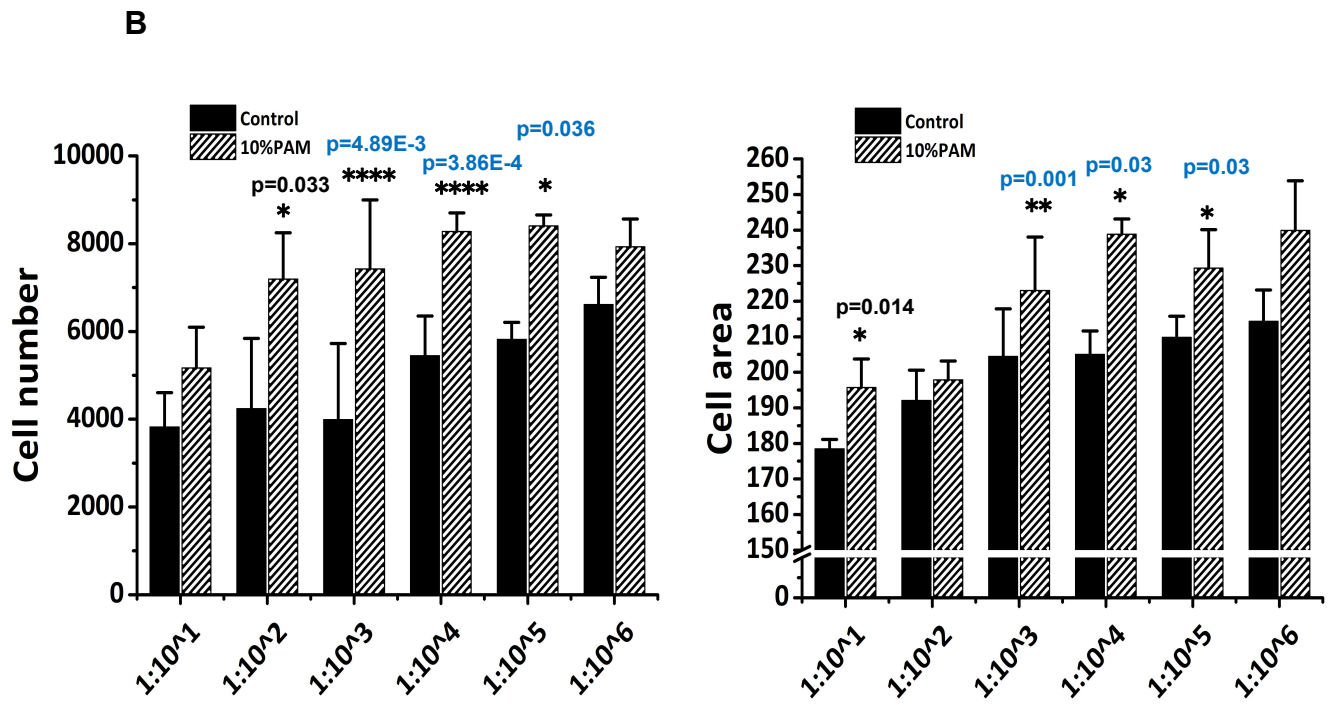

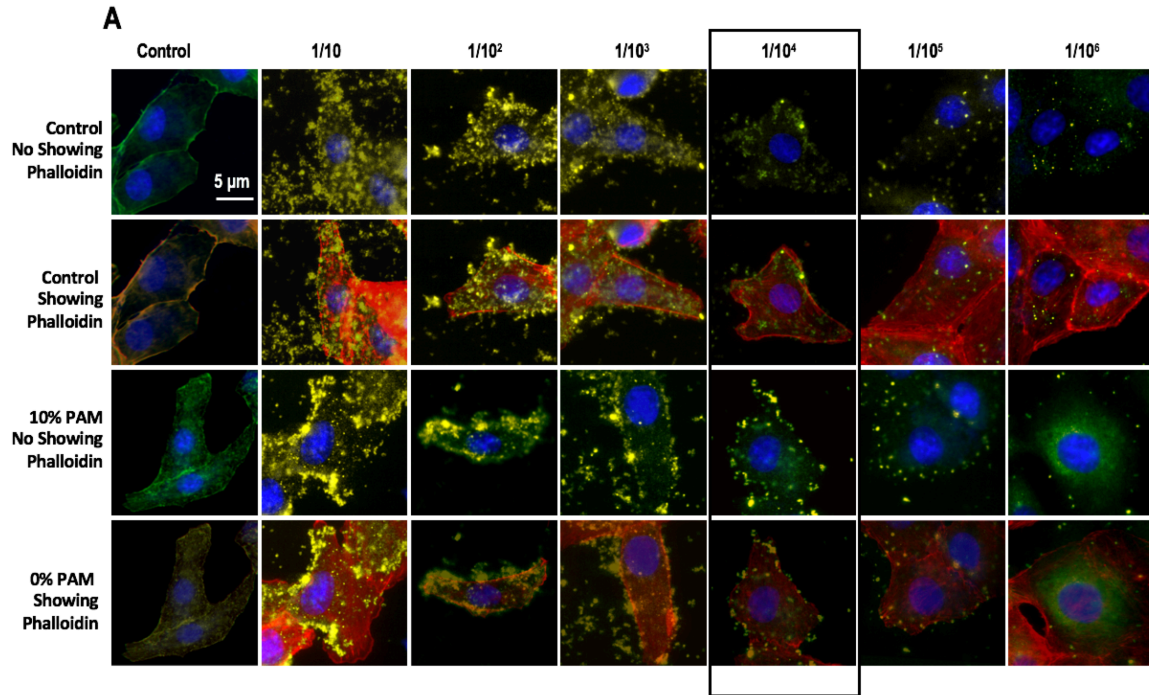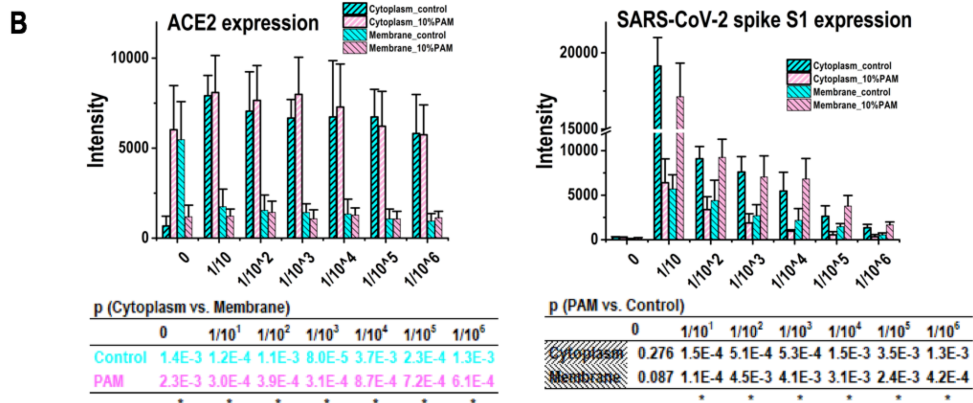

**Figure S2. Additional images showing the preventive role of CAP on Vero E6 cells against SARS-CoV-2 infection.** (A) Immunofluorescence for ACE2 (green) or SARS-CoV-2 viral particles (yellow) and staining for actin filaments (phalloidin; red) or DNA (Hoechst 33342; blue), showing extracellular virus on Vero E6 cells that underwent 0% PAM or 10% PAM pre-treatment prior to the infection with different dilution of 10E6.79 TCID50/mL SARS-CoV-2 virus. (B) Phalloidin staining of actin was used as a reference against which the number and intensity of stained particles were counted. Graphs show quantification of ACE2 staining or SARS-CoV-2 virus particles, conducted using IN Carta Analysis, and represent mean  $\pm$  SD of the data. Significance was assessed using Student's T-test and p-values for each comparison (0% vs 10% PAM) are shown in the Tables below each graph. n=4.

**A**

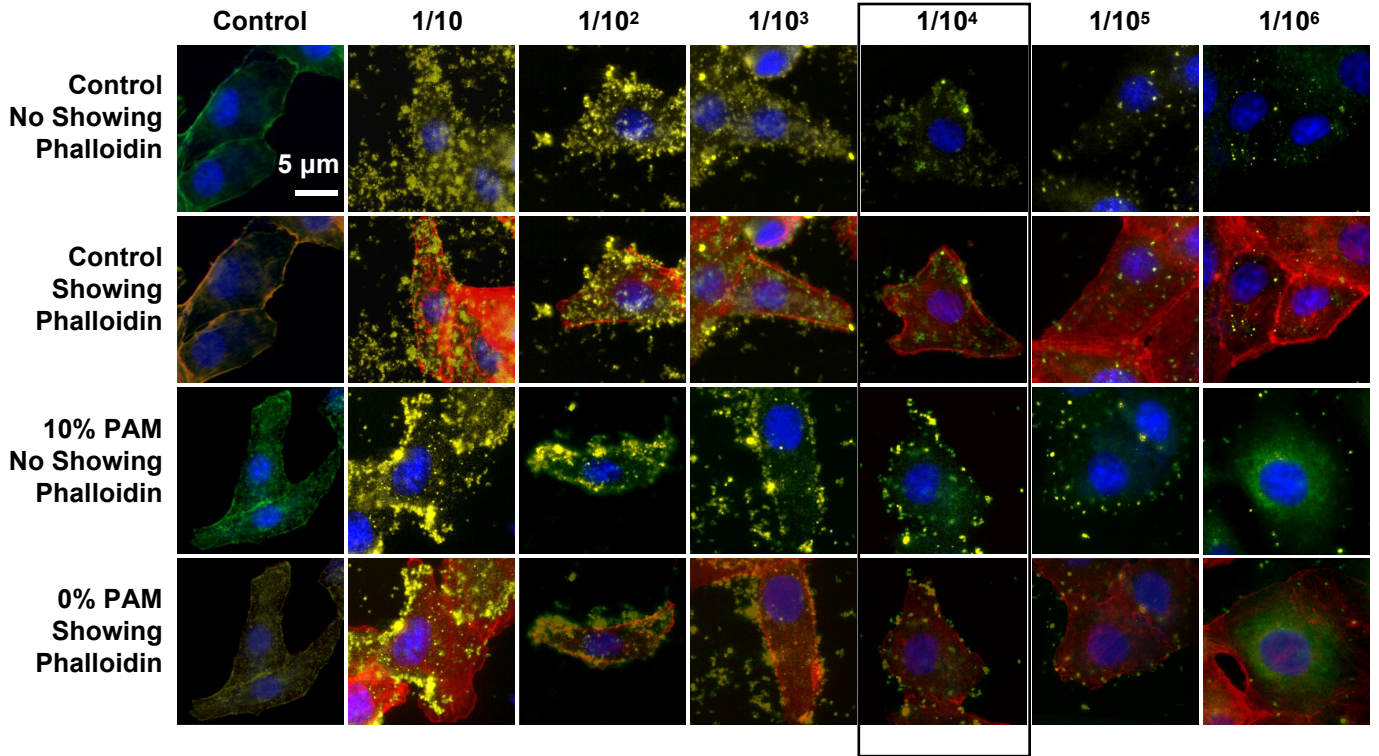

**B**

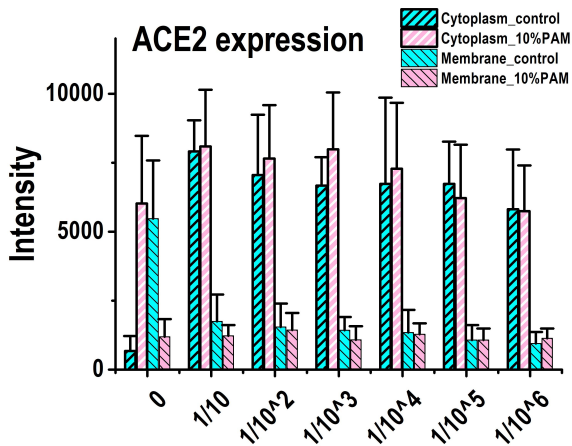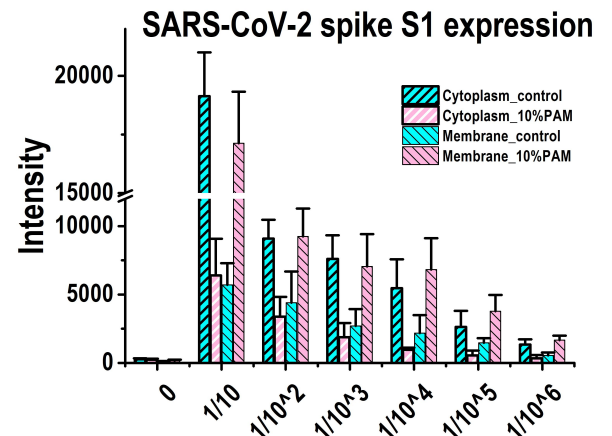

p (Cytoplasm vs. Membrane)

|         | 0      | 1/10 <sup>1</sup> | 1/10 <sup>2</sup> | 1/10 <sup>3</sup> | 1/10 <sup>4</sup> | 1/10 <sup>5</sup> | 1/10 <sup>6</sup> |
|---------|--------|-------------------|-------------------|-------------------|-------------------|-------------------|-------------------|
| Control | 1.4E-3 | 1.2E-4            | 1.1E-3            | 8.0E-5            | 3.7E-3            | 2.3E-4            | 1.3E-3            |
| PAM     | 2.3E-3 | 3.0E-4            | 3.9E-4            | 3.1E-4            | 8.7E-4            | 7.2E-4            | 6.1E-4            |

\*    \*    \*    \*    \*    \*    \*

p (PAM vs. Control)

|           | 0     | 1/10 <sup>1</sup> | 1/10 <sup>2</sup> | 1/10 <sup>3</sup> | 1/10 <sup>4</sup> | 1/10 <sup>5</sup> | 1/10 <sup>6</sup> |
|-----------|-------|-------------------|-------------------|-------------------|-------------------|-------------------|-------------------|
| Cytoplasm | 0.276 | 1.5E-4            | 5.1E-4            | 5.3E-4            | 1.5E-3            | 3.5E-3            | 1.3E-3            |
| Membrane  | 0.087 | 1.1E-4            | 4.5E-3            | 4.1E-3            | 3.1E-3            | 2.4E-3            | 4.2E-4            |

\*    \*    \*    \*    \*    \*



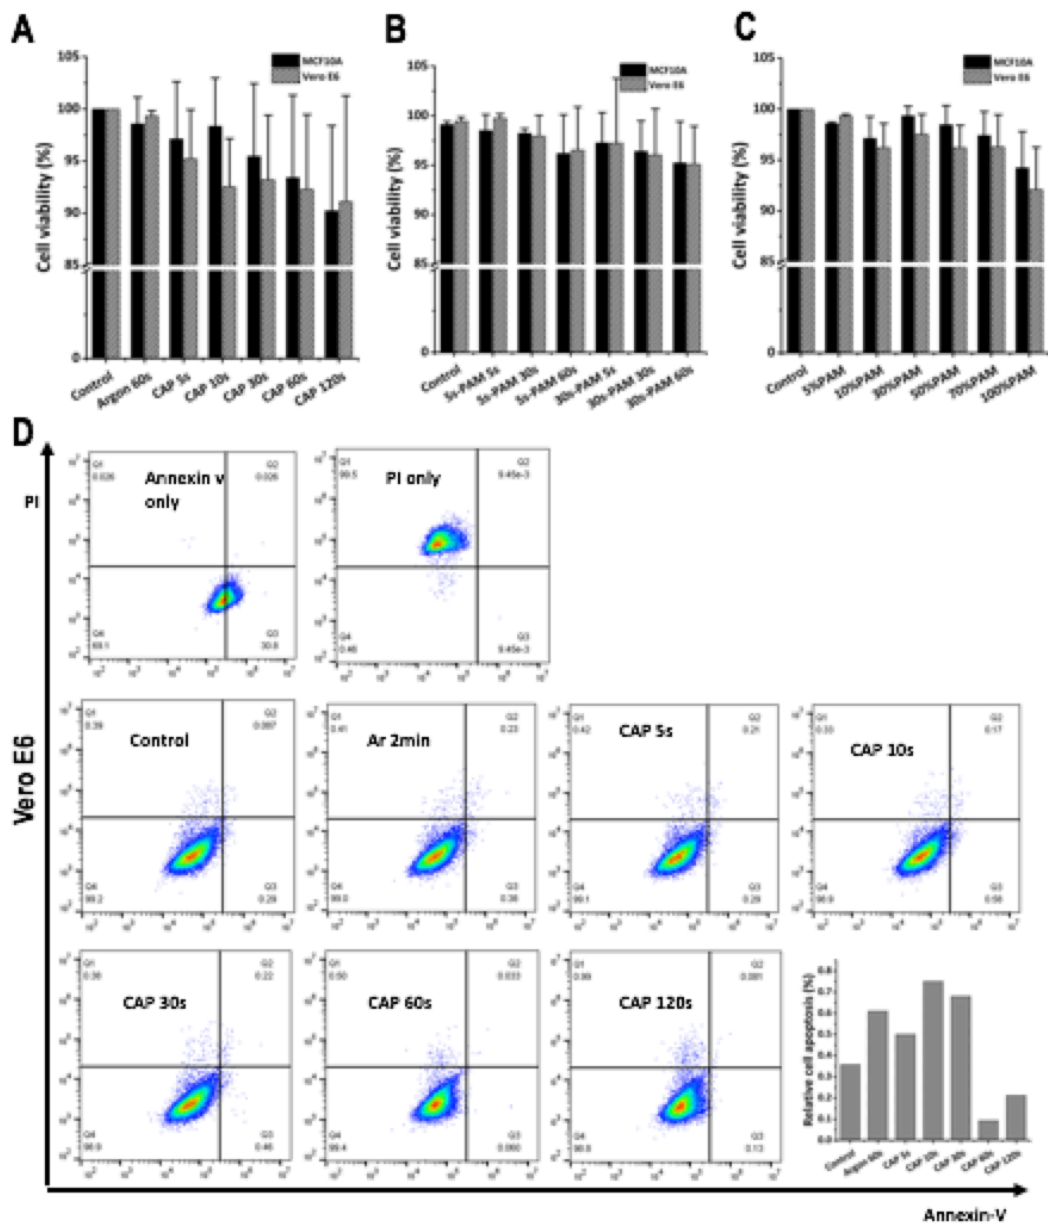

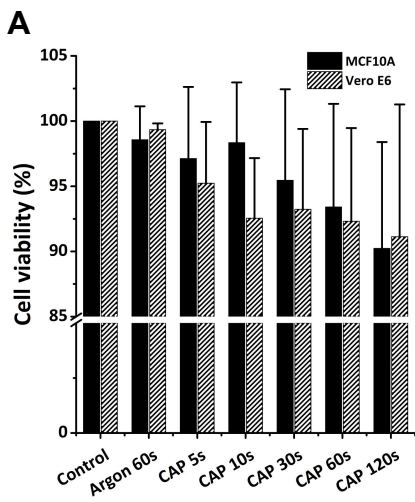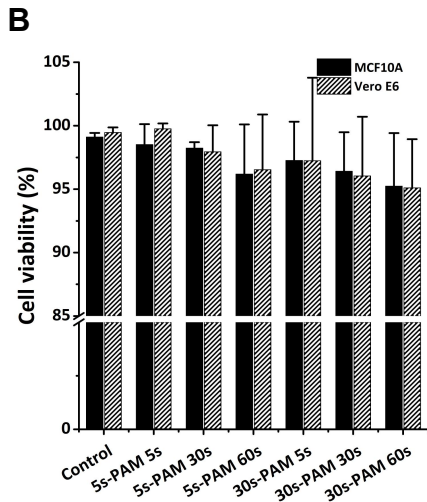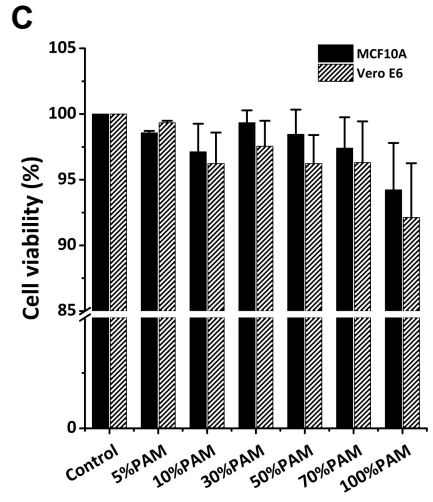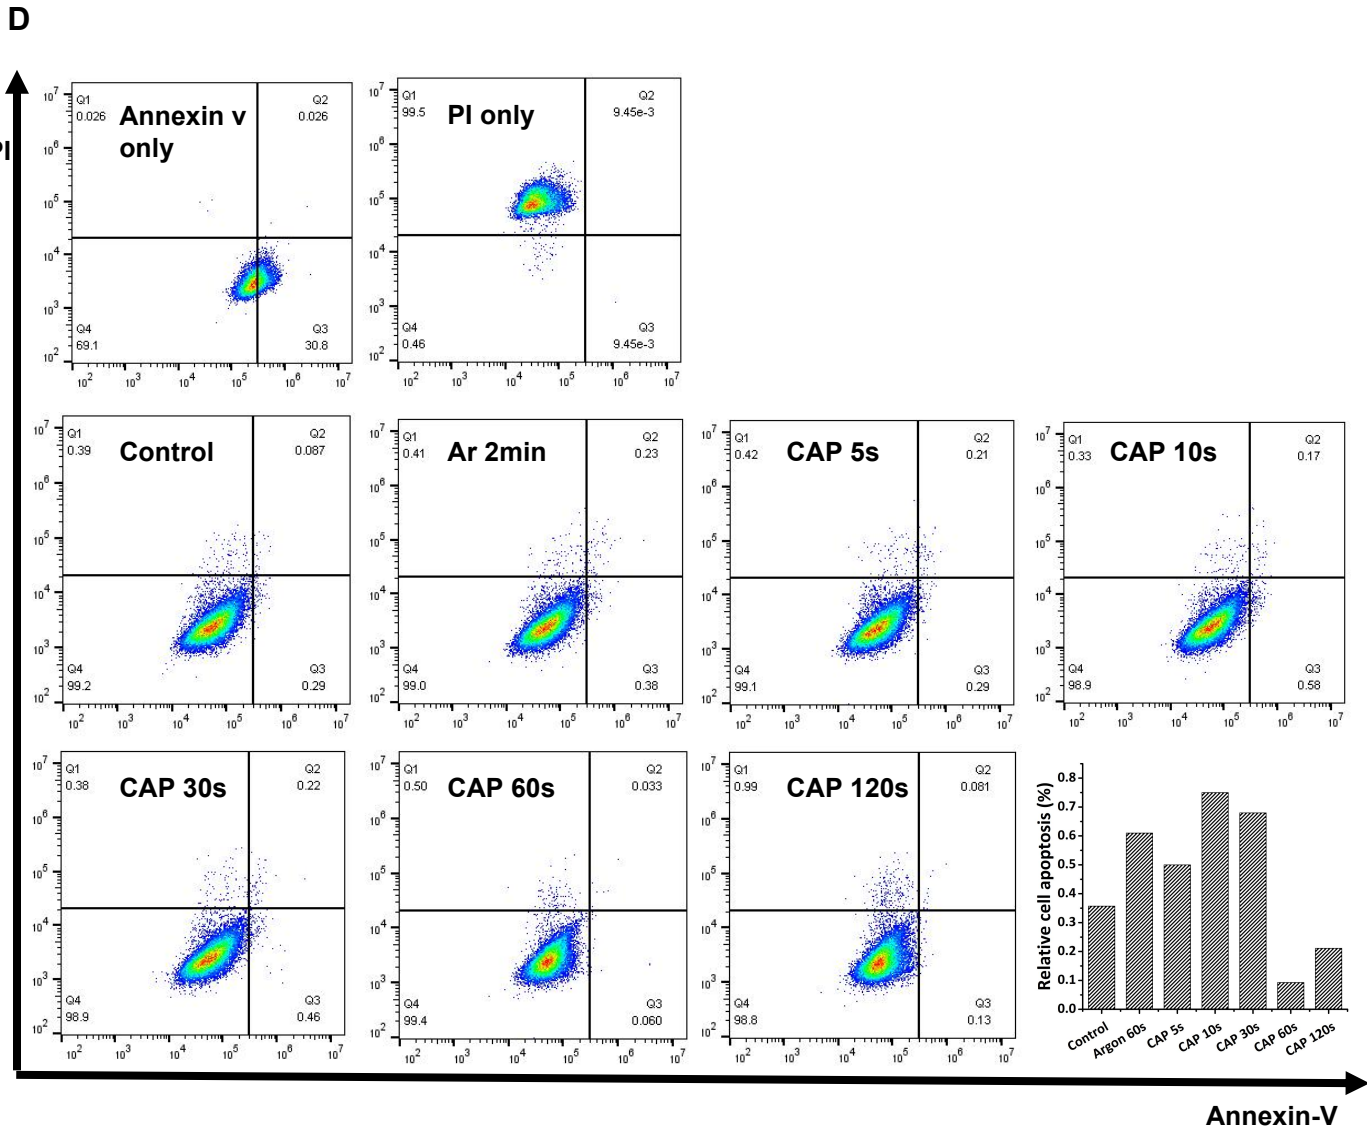

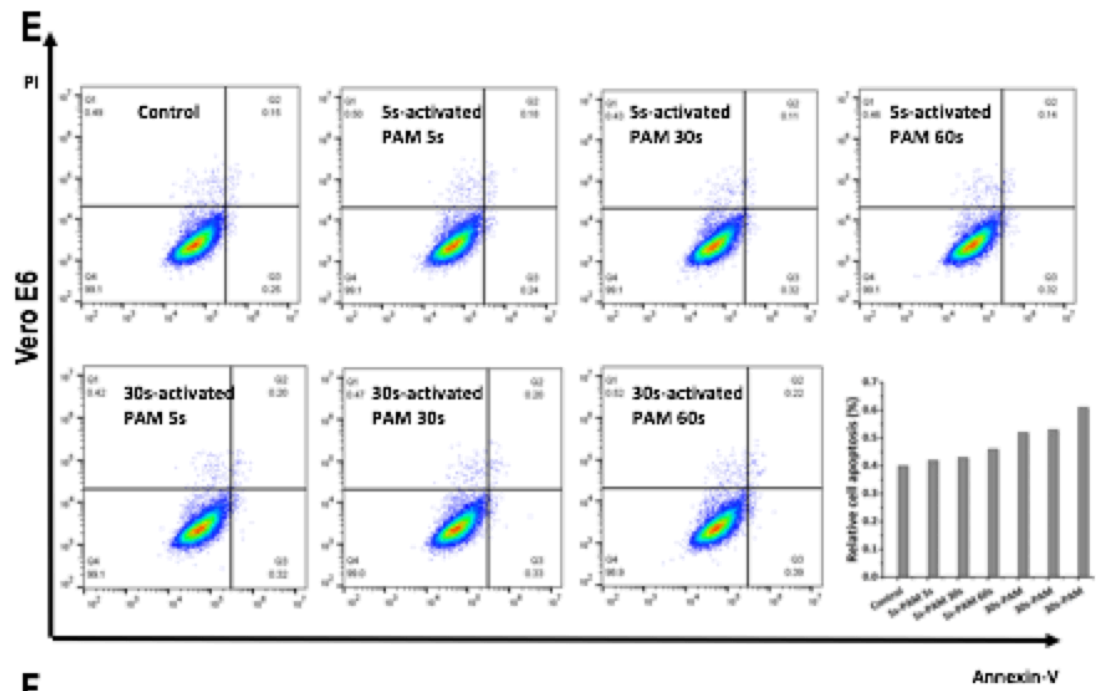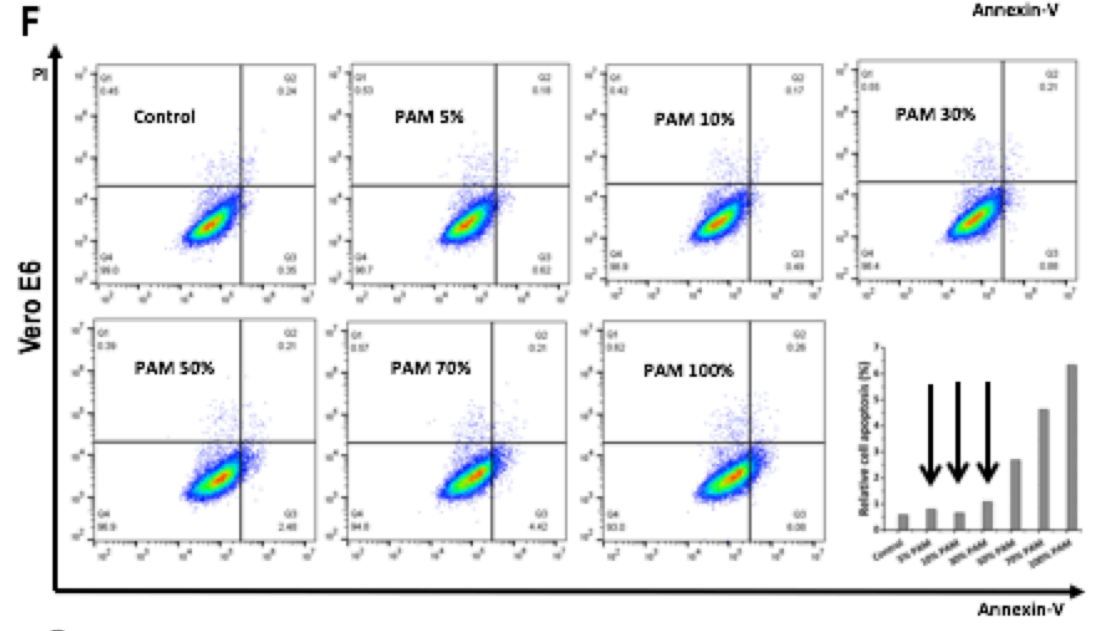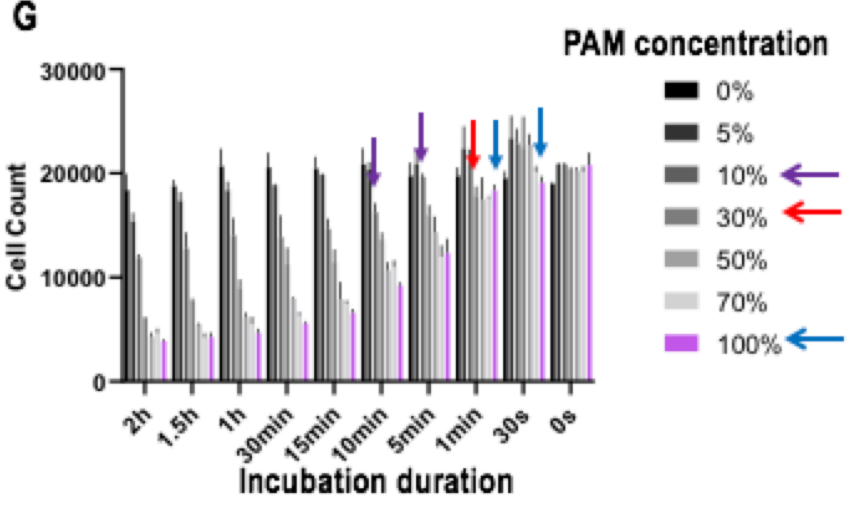

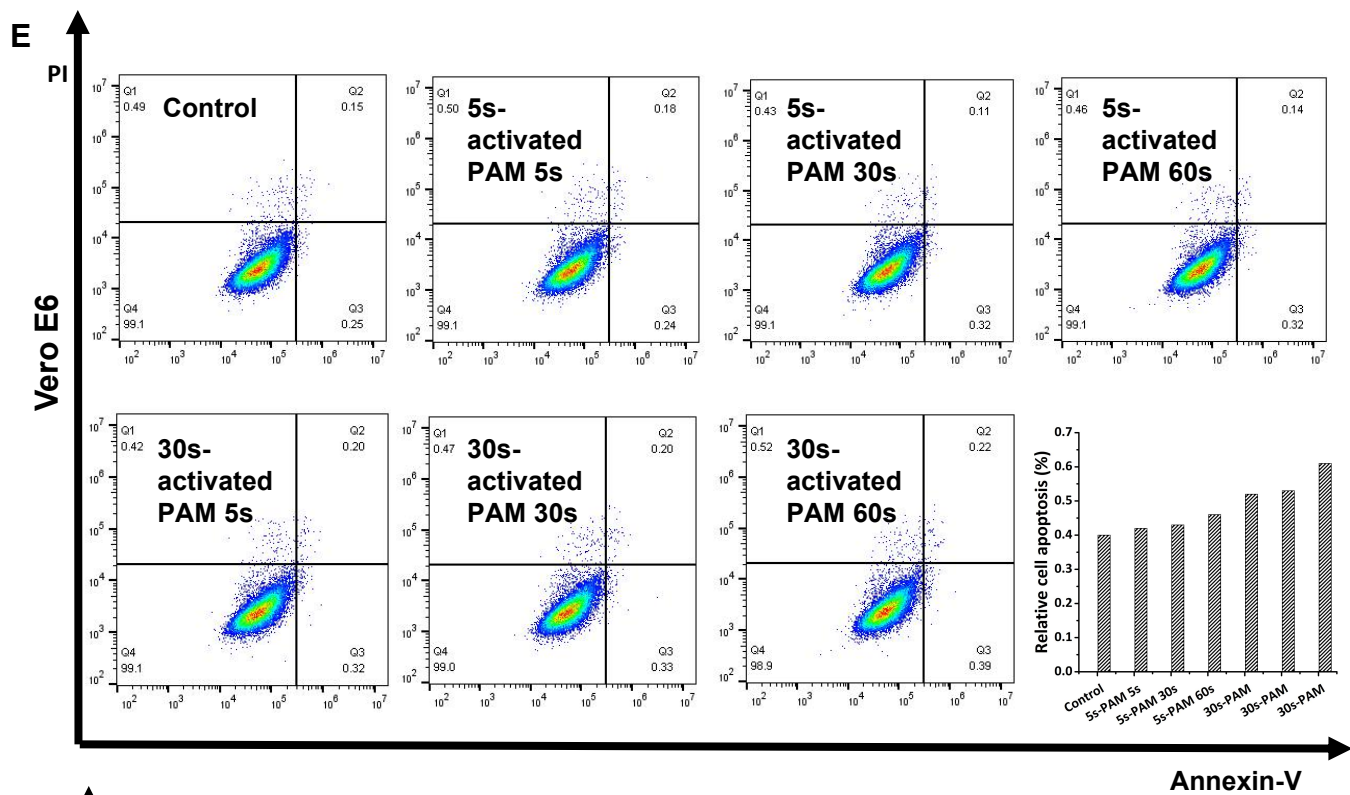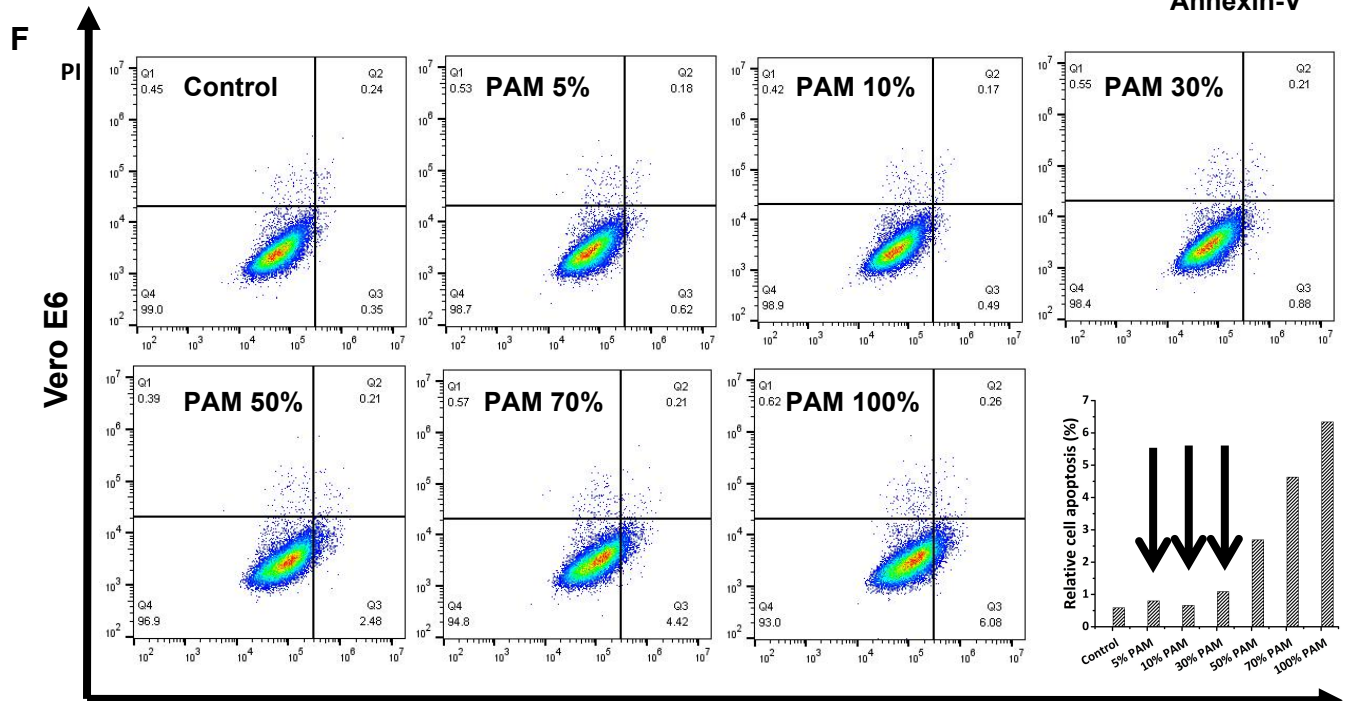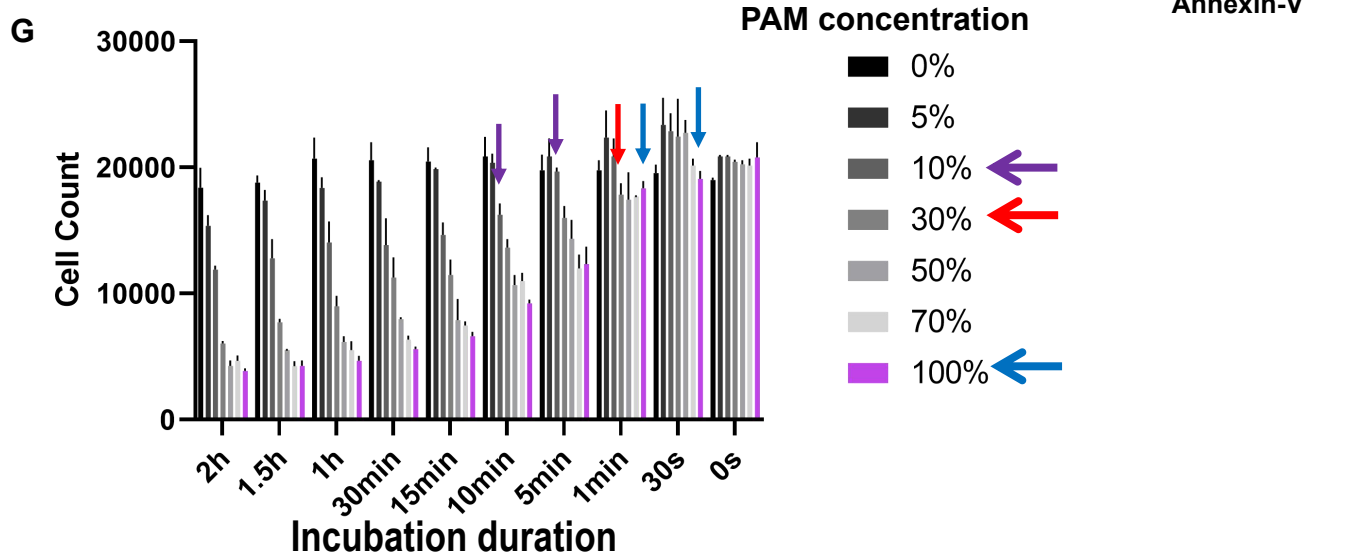

**Figure S3. Additional images showing the effects of different CAP and PAM concentrations on cell viability and apoptosis.** Viability of MCF10A and Vero E6 cells in response to (A) direct CAP treatment at different treatment durations, (B) indirect PAM treatment activated by CAP for different treatment durations, and (C) indirect 10-min activated PAM treatment diluted into different concentrations. Apoptosis of Vero E6 cells in response to (D) different CAP treatment durations, (E) different CAP exposure time activated PAM for different treatment durations, and (F) 1 min CAP exposure activated PAM diluted into different concentrations. (G) Vero E6 cell counts under PAM indirect treatment at different diluted concentrations and for different treatment durations.

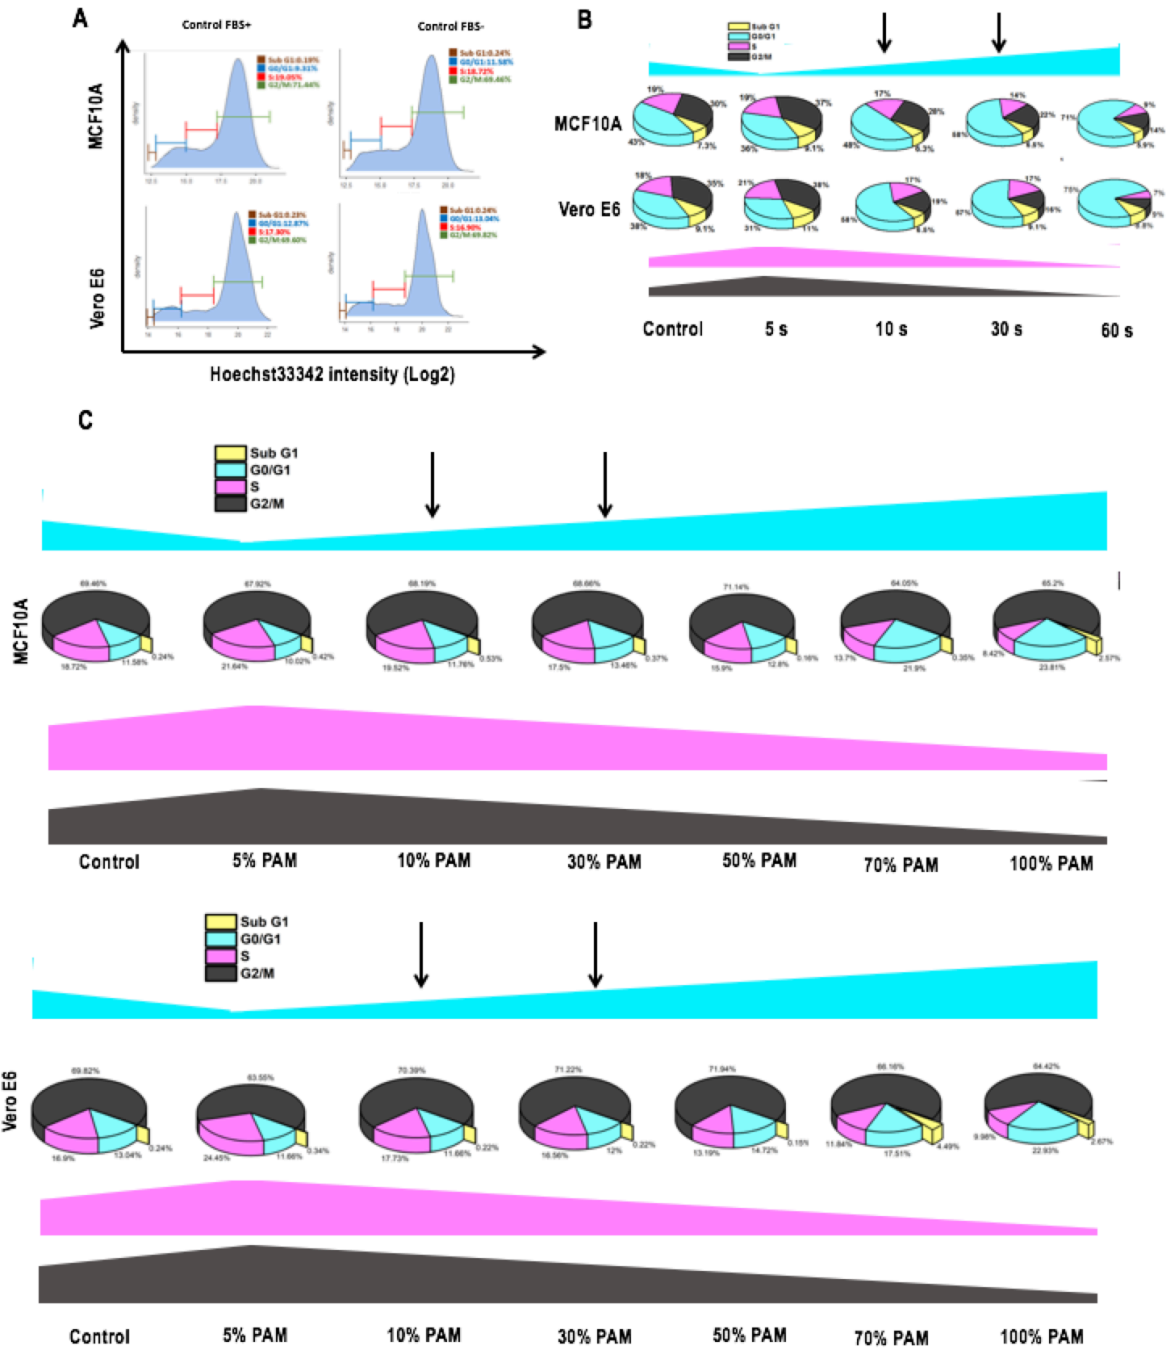

**Figure S4. Additional images showing the effects of different CAP and PAM concentrations on cell cycle.** (A) Effect of FCS on cell cycle in MCF10A and Vero E6 cells. Cell cycle alteration in response to (B) direct CAP treatment at different treatment durations in MCF10A and Vero E6 cells, and (C) indirect 10-min activated PAM treatment diluted into different concentrations in MCF10A and Vero E6 cells.

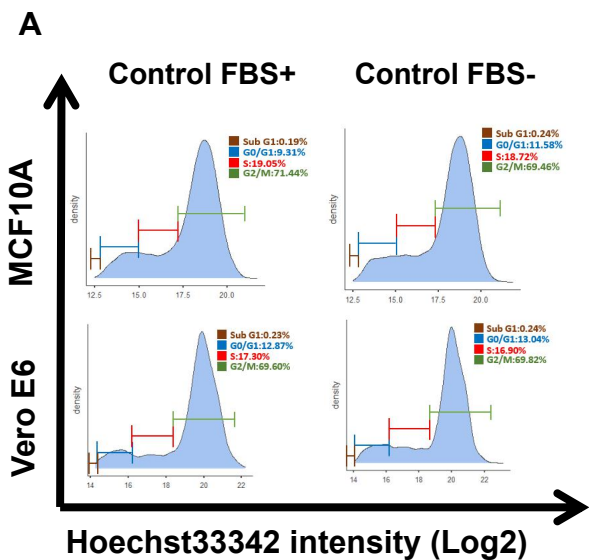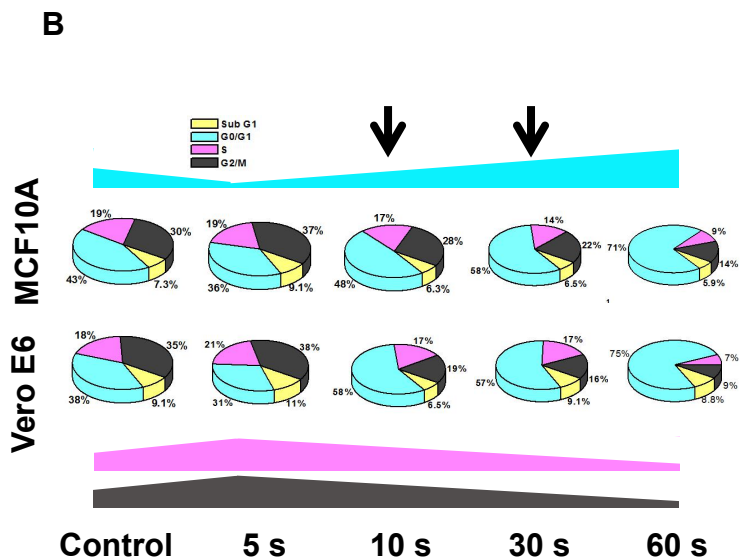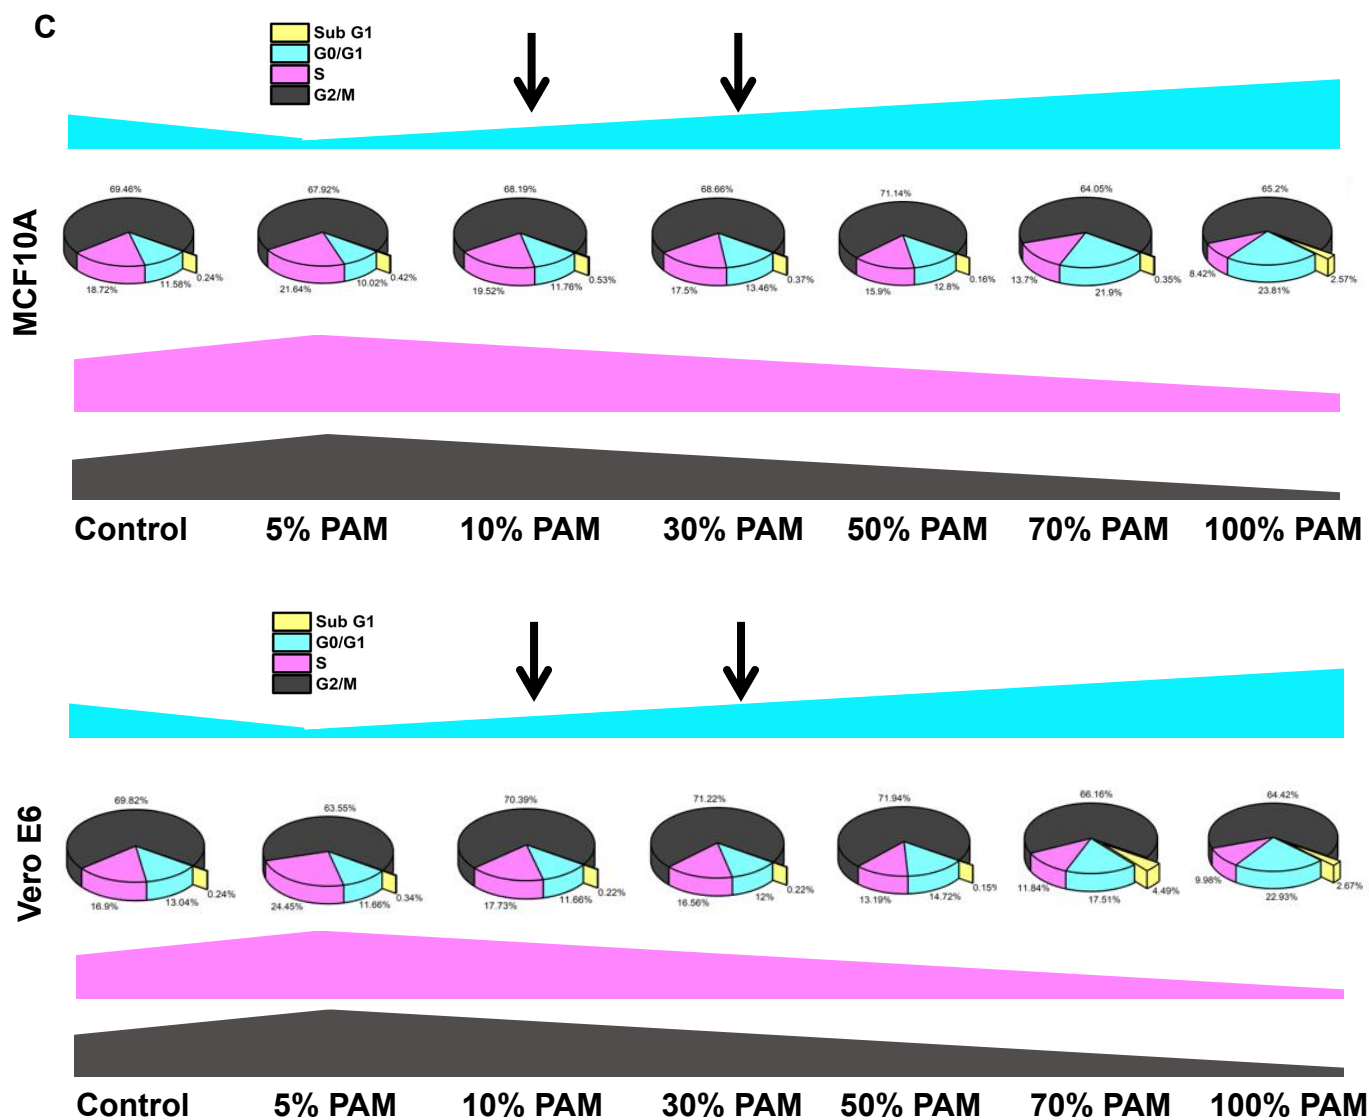

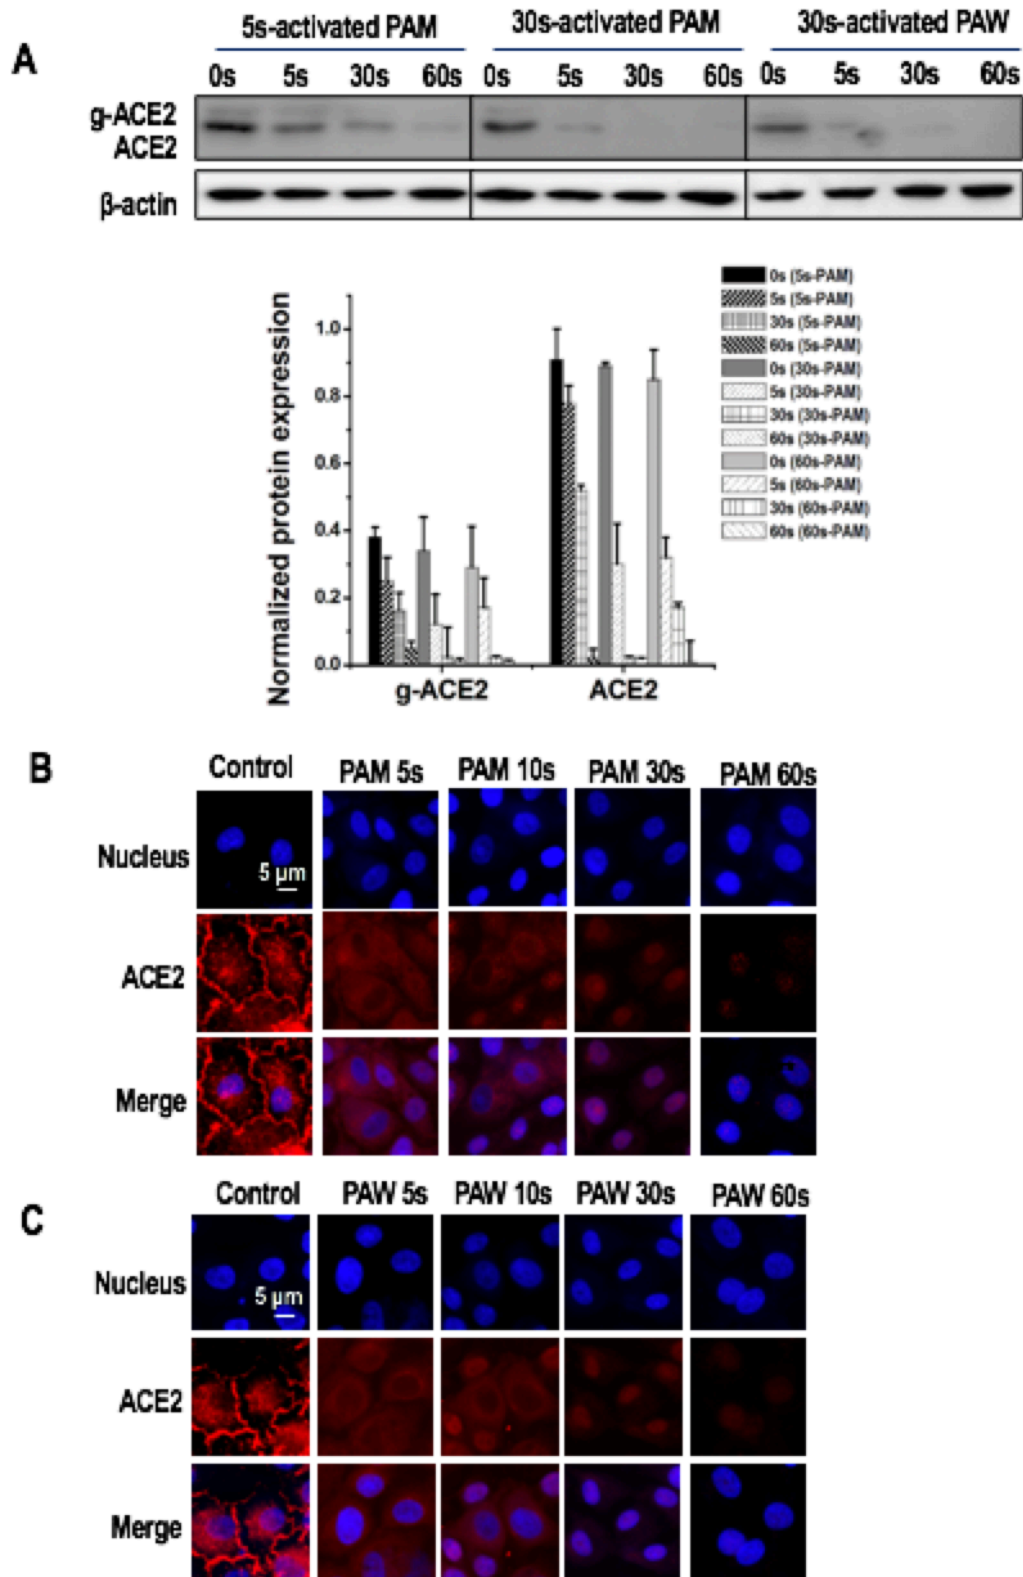

**Figure S5. Additional immunofluorescence and Western blots images showing ACE2 expression and cell localization after indirect CAP exposure for different durations.**

(A) Western blot of indirect PAM/PAW treatment.

(B) Quantification of ACE2 on indirect PAM/PAW treatment.

(C) Immunofluorescence images of ACE2 on indirect PAM treatment.

(D) Immunofluorescence images of ACE2 on indirect PAW treatment. PAM = plasma activated medium; PAW = plasma activated PBS. MCF10A cells were used. Scale bar=5 μm.

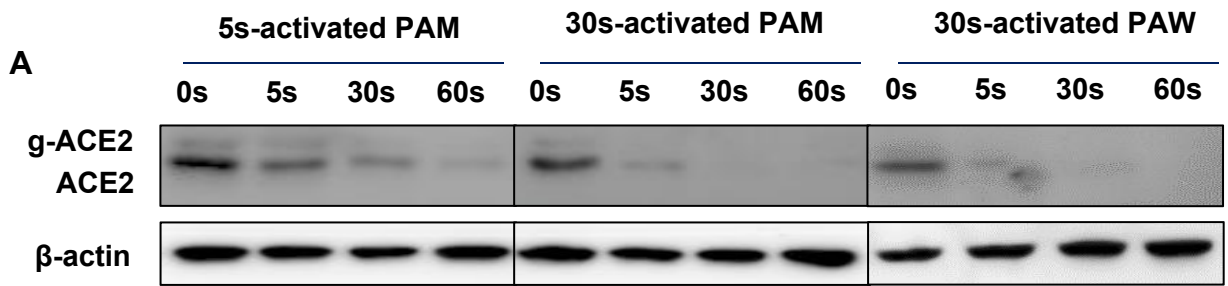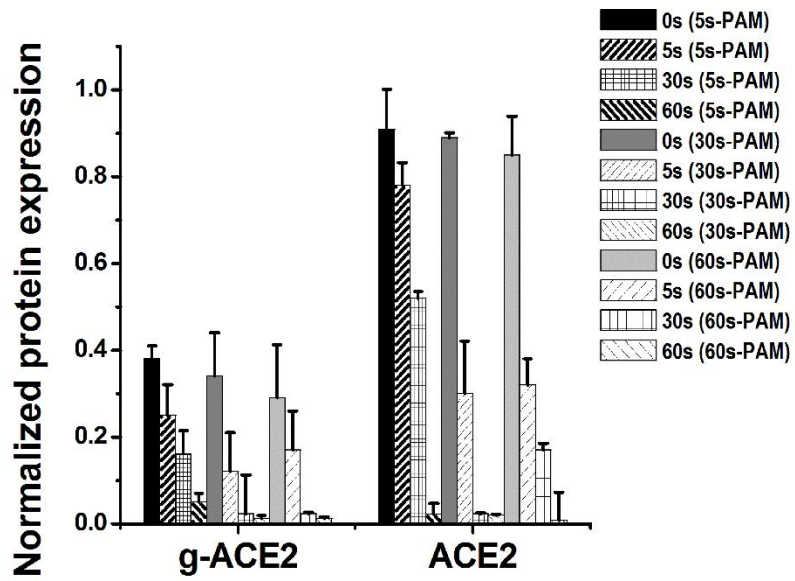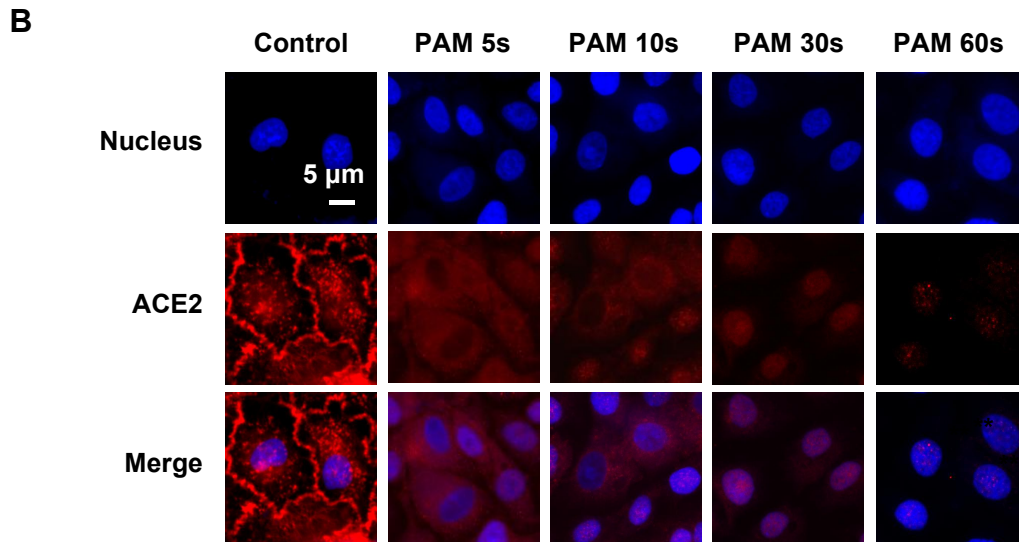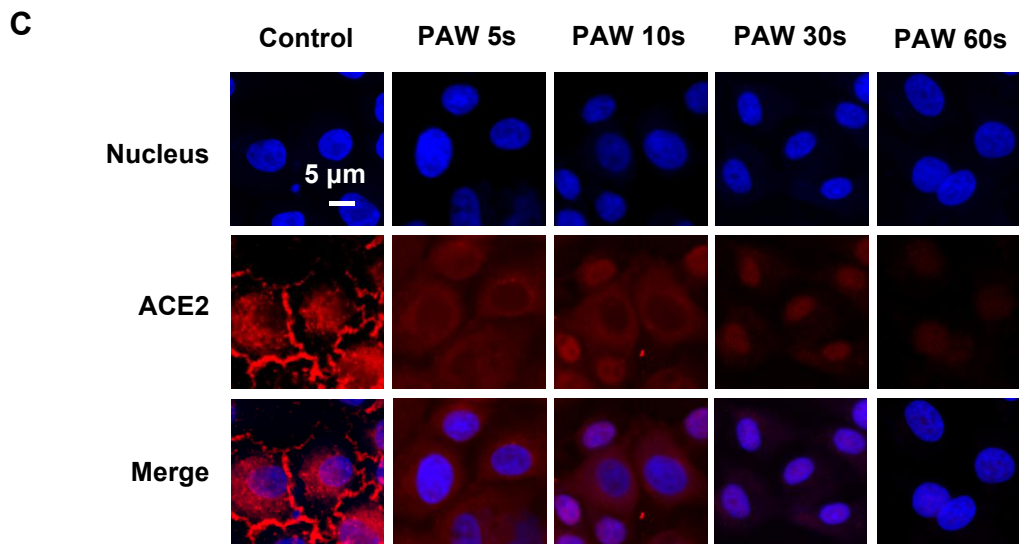



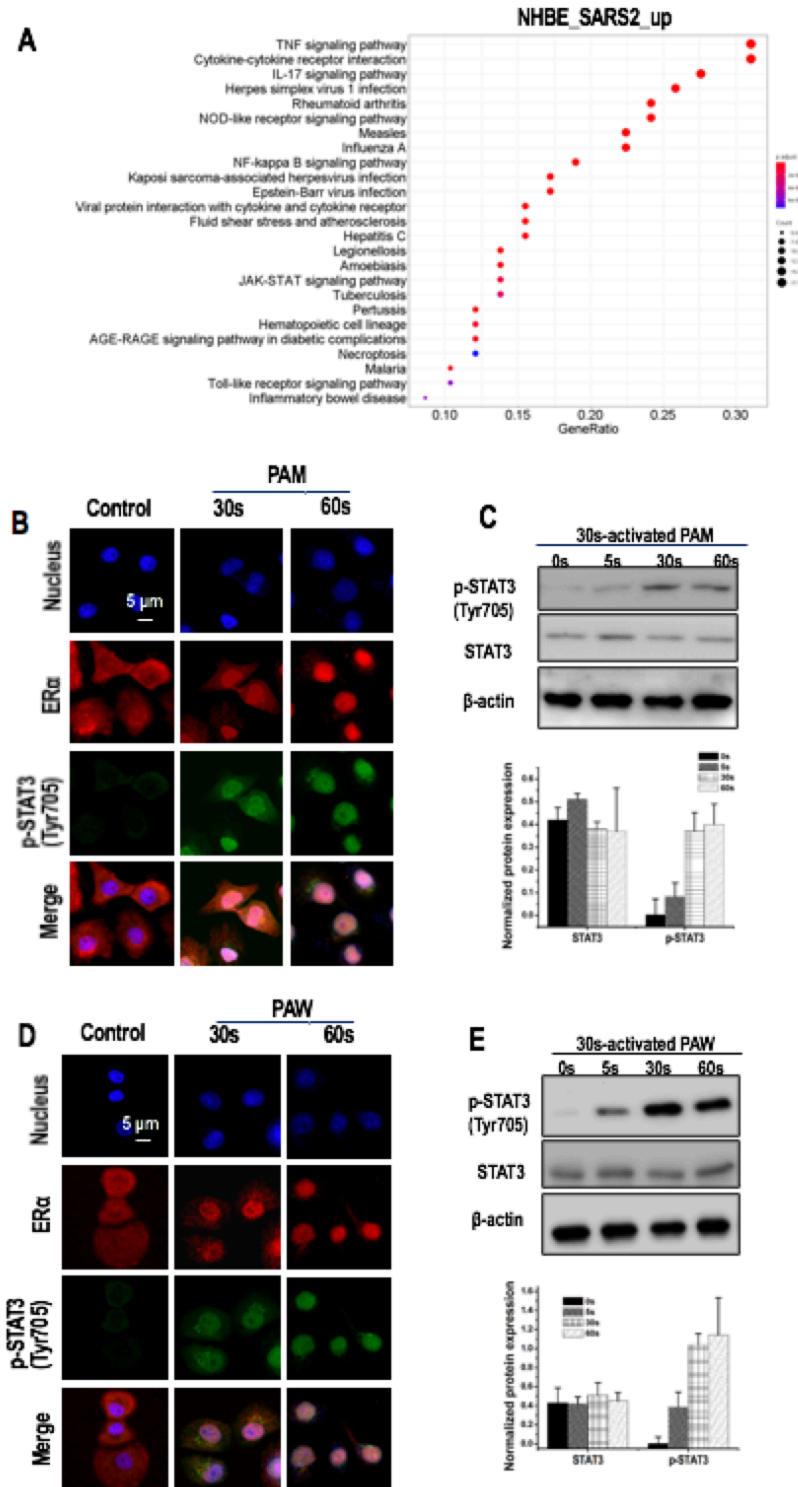

**Figure S6. Additional immunofluorescence and western blot images showing ER $\alpha$  and STAT3(Tyr705) expression and cell localization after indirect CAP exposure under different durations.**

(A) Up-regulated KEGG pathways enriched by differentially expressed genes in human bronchial epithelial (NHBE) cells on SARS-CoV-2 infection.

(B) Immunofluorescence images showing ER $\alpha$ , phospho-STAT3(Tyr705) location after indirect PAM treatment for different durations.

(C) Western blot and quantification showing phospho-STAT3(Tyr705) expression after indirect PAM treatment for different durations.

(D) Immunofluorescence image showing ER $\alpha$ , phospho-STAT3(Tyr705) location after indirect PAW treatment for different durations.

(E) Western blot and quantification showing phospho-STAT3(Tyr705) expression after indirect PAW treatment for different durations. PAM = plasma activated medium; PAW = plasma activated PBS. MCF10A cells were used.

# NHBE\_SARS2\_up

**A**

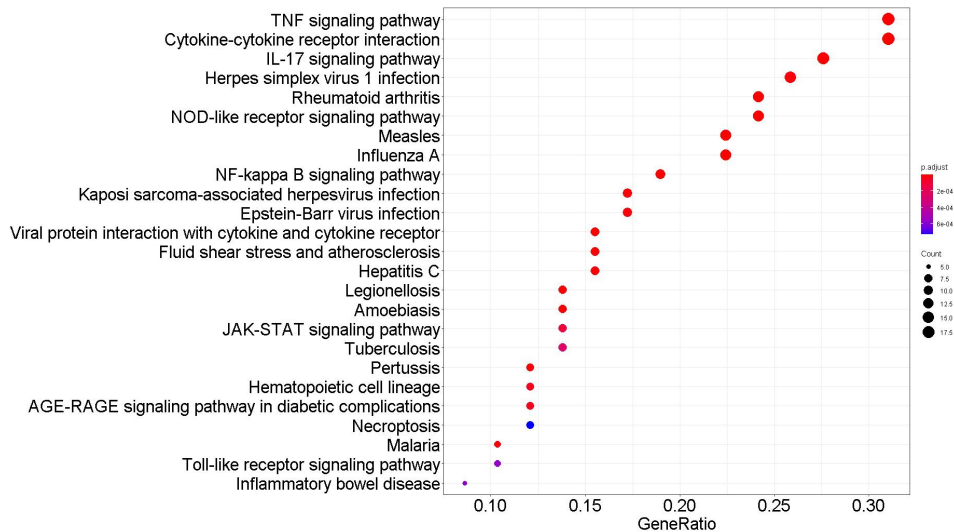

**B**

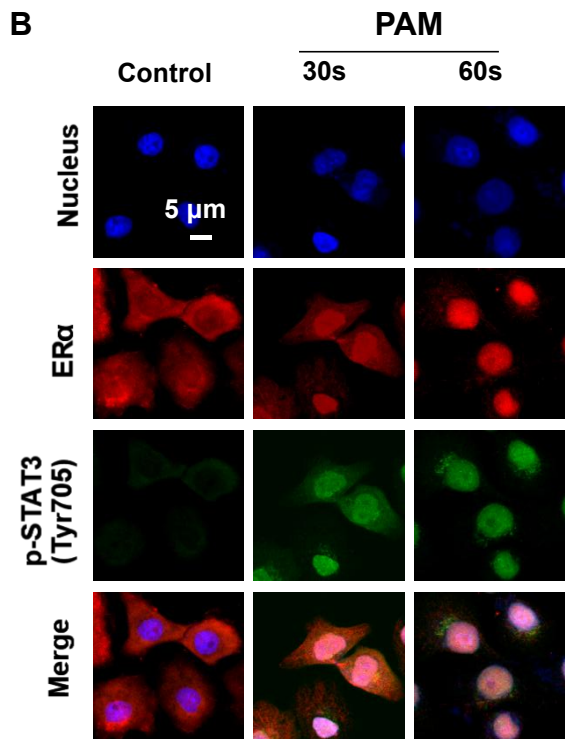

**C**

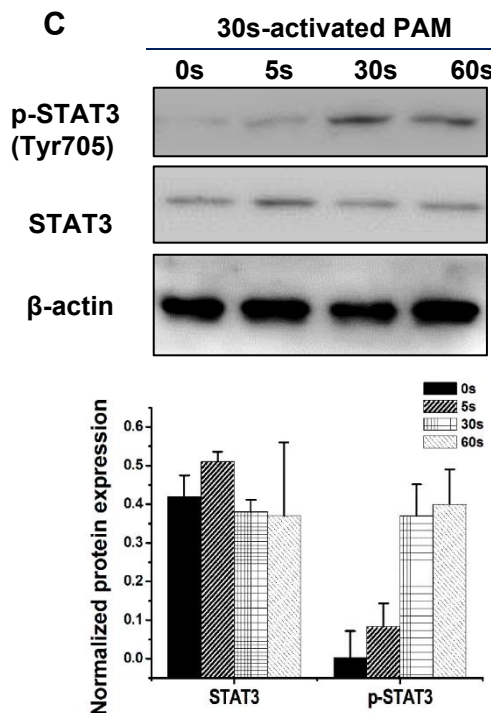

**D**

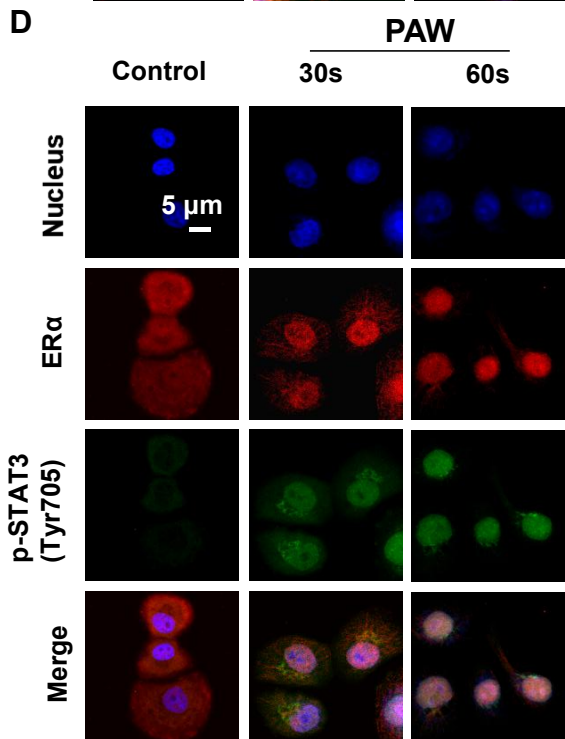

**E**

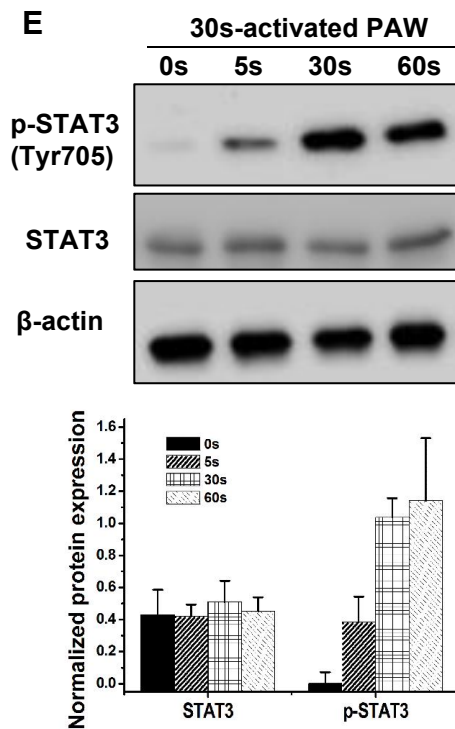

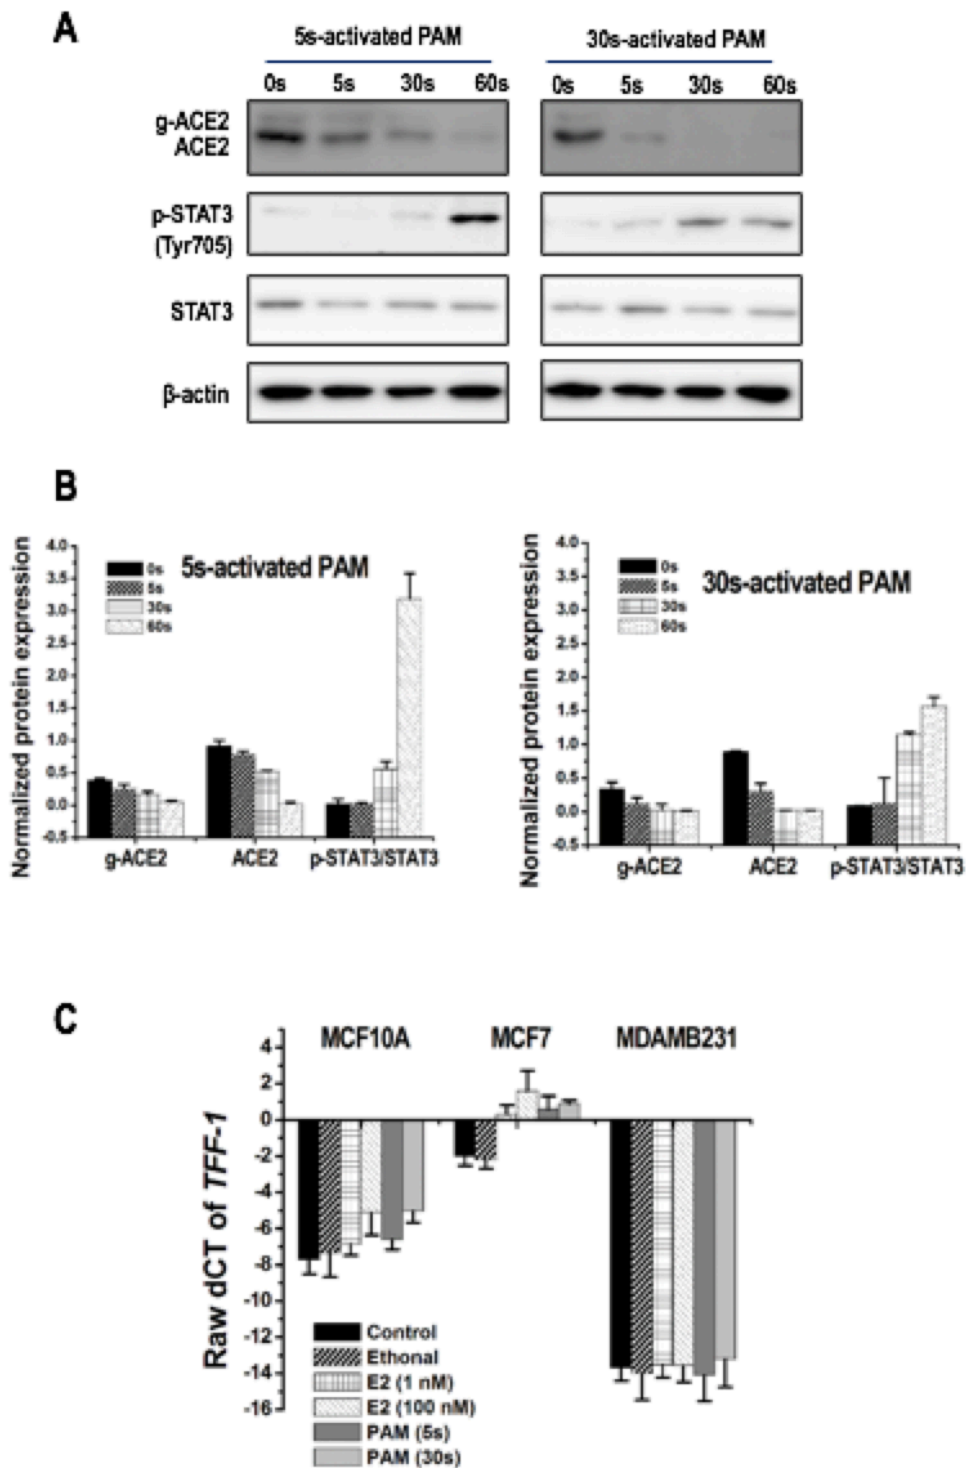

**Figure S7. Additional images showing the dosing effect of PAM and estradiol on ACE2 and the ER $\alpha$ /phospho-STAT3(Tyr705) axis.** (A) Western blot and (B) quantification of ACE2, STAT3, phospho-STAT3(Tyr705) expression by MCF7 cells incubated with 5 s- and 30 s- activated PAM for different durations. (C) RT-qPCR results showing expression of TFF-1 (a highly sensitive ER-response reporter) after treatment with different doses of PAM and estradiol in MCF10A cells, MDA-MB-231 cells and MCF-7 cells. In (C), TFF-1 raw Ct (cycle threshold) values are defined as the number of cycles required for the fluorescent signal to cross the threshold (*i.e.* exceed background level). Ct levels are inversely proportional to the amount of target nucleic acid in the sample (*i.e.*, the lower the Ct level the greater the amount of target nucleic acid in the sample); a  $dCt > 1$  is indicative of abundant target mRNA in the sample;  $-10 < dCt < 1$  is indicative of moderate amounts of target mRNA;  $dCt < -10$  is indicative of minimal amounts of target mRNA that could be due to environmental contaminations. Ethanol, the solution used for diluting E2, was used as a control in (C). 30 min was used for both E2 and PAM treatment in the RT-PCR testing TFF-1 gene expression.

**A**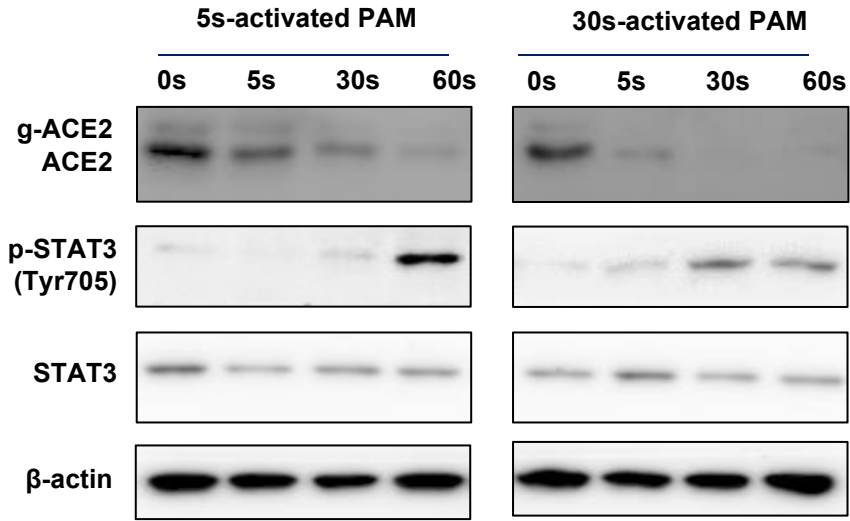**B**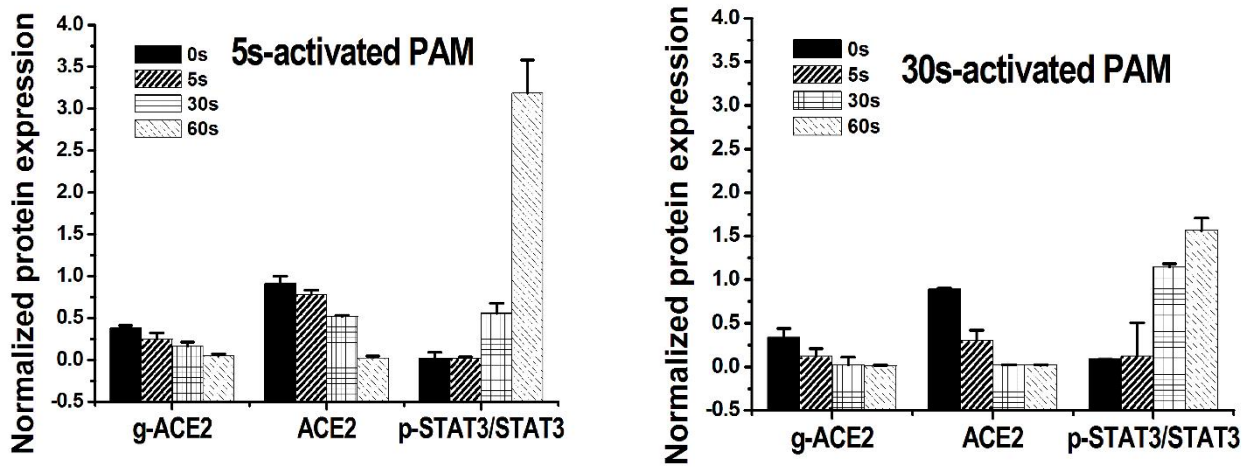**C**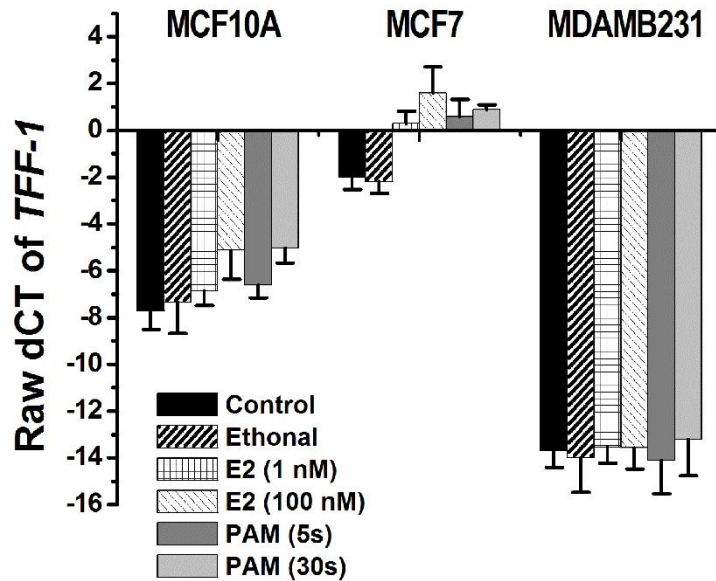

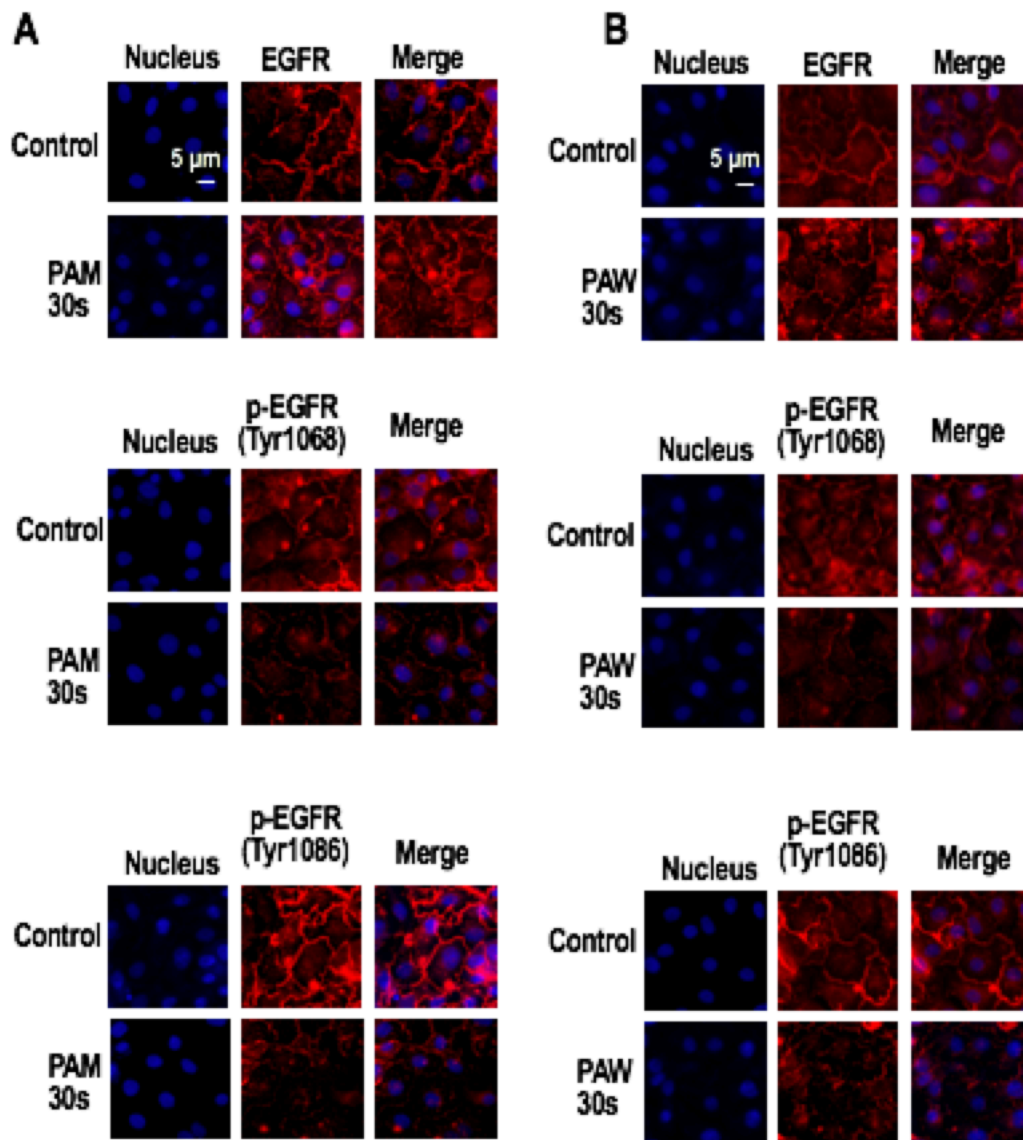

**Figure S8. Additional immunofluorescence images showing EGFR(Tyr1068) and EGFR(Tyr1086) expression and cell localization after indirect CAP exposure for 30s. (A) Immunofluorescence image showing EGFR(Tyr1068) and EGFR(Tyr1086) location after indirect (A) PAM and(B), PAW treatment for 30 s. Scale bar=8 μm.**

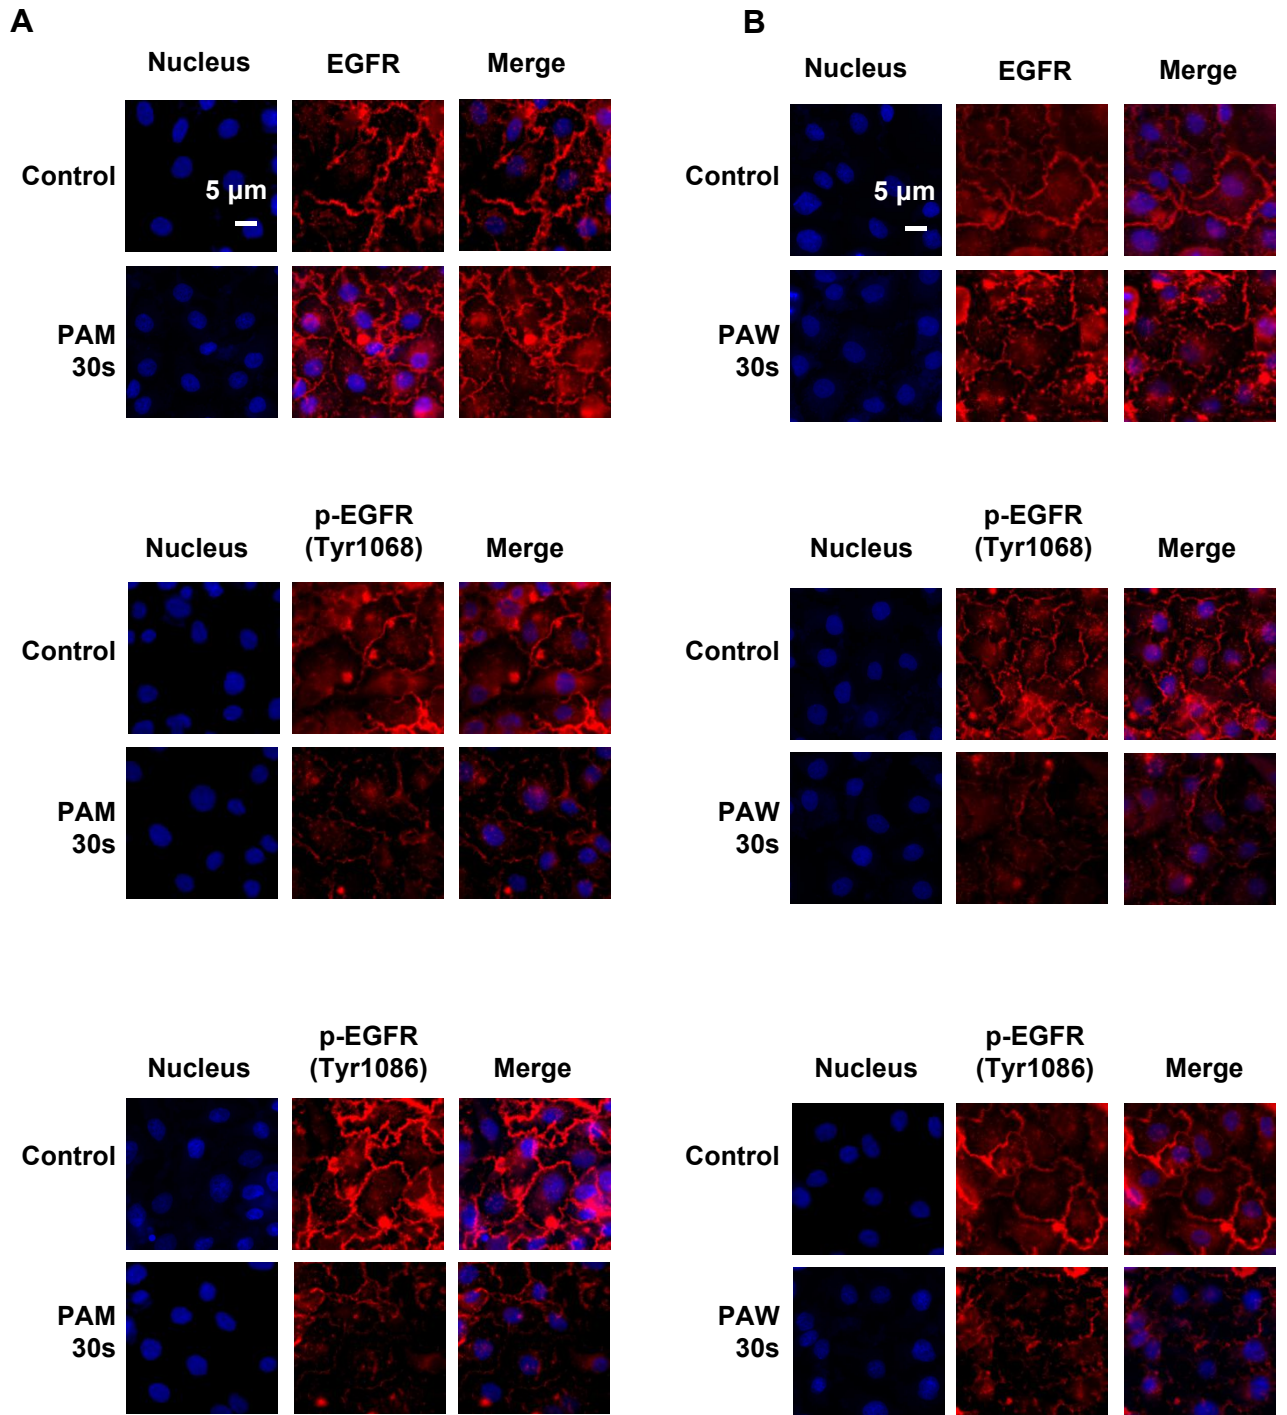

Supplement: thnov12p2811s1.pdf [file thnov12p2811s1.pdf]
